# Supplementary material for: Efficient synthesis of benzobisazole terpolymers containing thiophene and fluorene
Source: Royal Society of Chemistry journal article supplement (doi:10.1039/c1py00218j), 2011-01-01

Supporting Information for:

**Efficient Synthesis of Benzobisazole Terpolymers Containing Thiophene and Fluorene.†**

Jared F. Mike<sup>a</sup>, Jeremy J. Intemann<sup>a</sup>, Min Cai<sup>b</sup>, Teng Xiao<sup>b</sup>, Ruth Shinar<sup>c</sup>, Joseph Shinar<sup>b</sup> and Malika Jeffries-EL<sup>\*a</sup>

<sup>a</sup> Department of Chemistry, Iowa State University, 1605 Gilman Hall, Ames, IA 50010, <sup>b</sup> Department of Physics and Ames Laboratory-DOE, Iowa State University, Ames, IA 50011, <sup>c</sup> Department of Electrical Engineering and Microelectronics Research Center, Iowa State University, Ames, IA 50011, USA.

[malikaj@iastate.edu](mailto:malikaj@iastate.edu)

|        |                                                                           |     |
|--------|---------------------------------------------------------------------------|-----|
| I.     | <b>Figure S1.</b> TGA curves of <b>P1</b> , <b>P2</b> and <b>P3</b> ..... | S2  |
| II.    | <b>Figure S2.</b> DSC curves of <b>P1</b> , <b>P2</b> and <b>P3</b> ..... | S3  |
| III.   | <b>Figure S3.</b> X-ray data of polymer films.....                        | S4  |
| IV.    | <b>Figure S4.</b> Cyclic Voltammetry of polymer films.....                | S7  |
| V.     | <b>Figure S5.</b> Differential Pulse Voltammetry of polymer films.....    | S8  |
| VI.    | <b>Figure S6.</b> <sup>1</sup> H NMR spectrum of <b>2</b> .....           | S9  |
| VII.   | <b>Figure S7.</b> <sup>13</sup> C NMR spectrum of <b>2</b> .....          | S10 |
| VIII.  | <b>Figure S8.</b> <sup>1</sup> H NMR spectrum of <b>6</b> .....           | S11 |
| IX.    | <b>Figure S9.</b> <sup>13</sup> C NMR spectrum of <b>6</b> .....          | S12 |
| X.     | <b>Figure S10.</b> <sup>1</sup> H NMR spectrum of <b>7</b> .....          | S13 |
| XI.    | <b>Figure S11.</b> <sup>13</sup> C NMR spectrum of <b>7</b> .....         | S14 |
| XII.   | <b>Figure S12.</b> <sup>1</sup> H NMR spectrum of <b>8</b> .....          | S15 |
| XIII.  | <b>Figure S13.</b> <sup>13</sup> C NMR spectrum of <b>8</b> .....         | S16 |
| XIV.   | <b>Figure S14.</b> <sup>1</sup> H NMR spectrum of <b>P1</b> .....         | S17 |
| XV.    | <b>Figure S15.</b> <sup>13</sup> C NMR spectrum of <b>P1</b> .....        | S18 |
| XVI.   | <b>Figure S16.</b> <sup>1</sup> H NMR spectrum of <b>P2</b> .....         | S19 |
| XVII.  | <b>Figure S17.</b> <sup>13</sup> C NMR spectrum of <b>P2</b> .....        | S20 |
| XVIII. | <b>Figure S18.</b> <sup>1</sup> H NMR spectrum of <b>P3</b> .....         | S21 |
| XIX.   | <b>Figure S19.</b> <sup>13</sup> C NMR spectrum of <b>P3</b> .....        | S22 |

**Figure S1.** TGA curves of poly(arylenebenzobisazoles). TGA's were obtained under N<sub>2</sub> at a heating rate of 15°C/min.

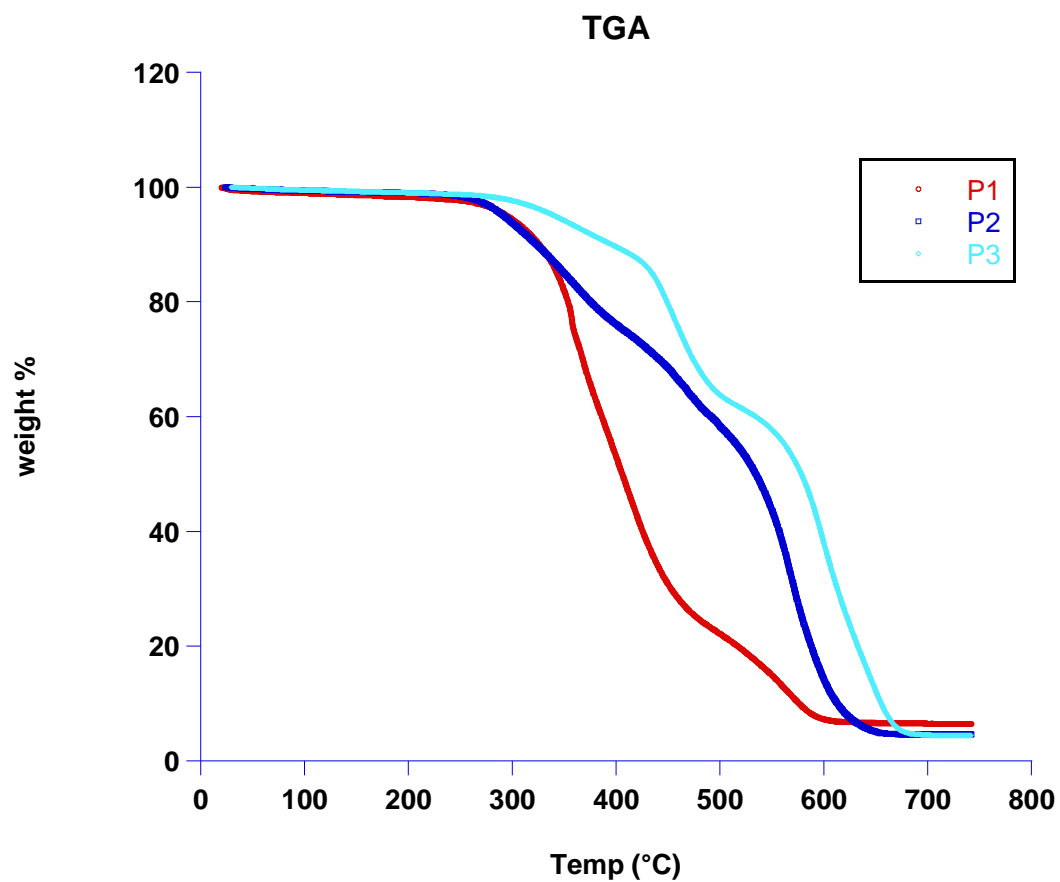

Figure S2. DSC curves.

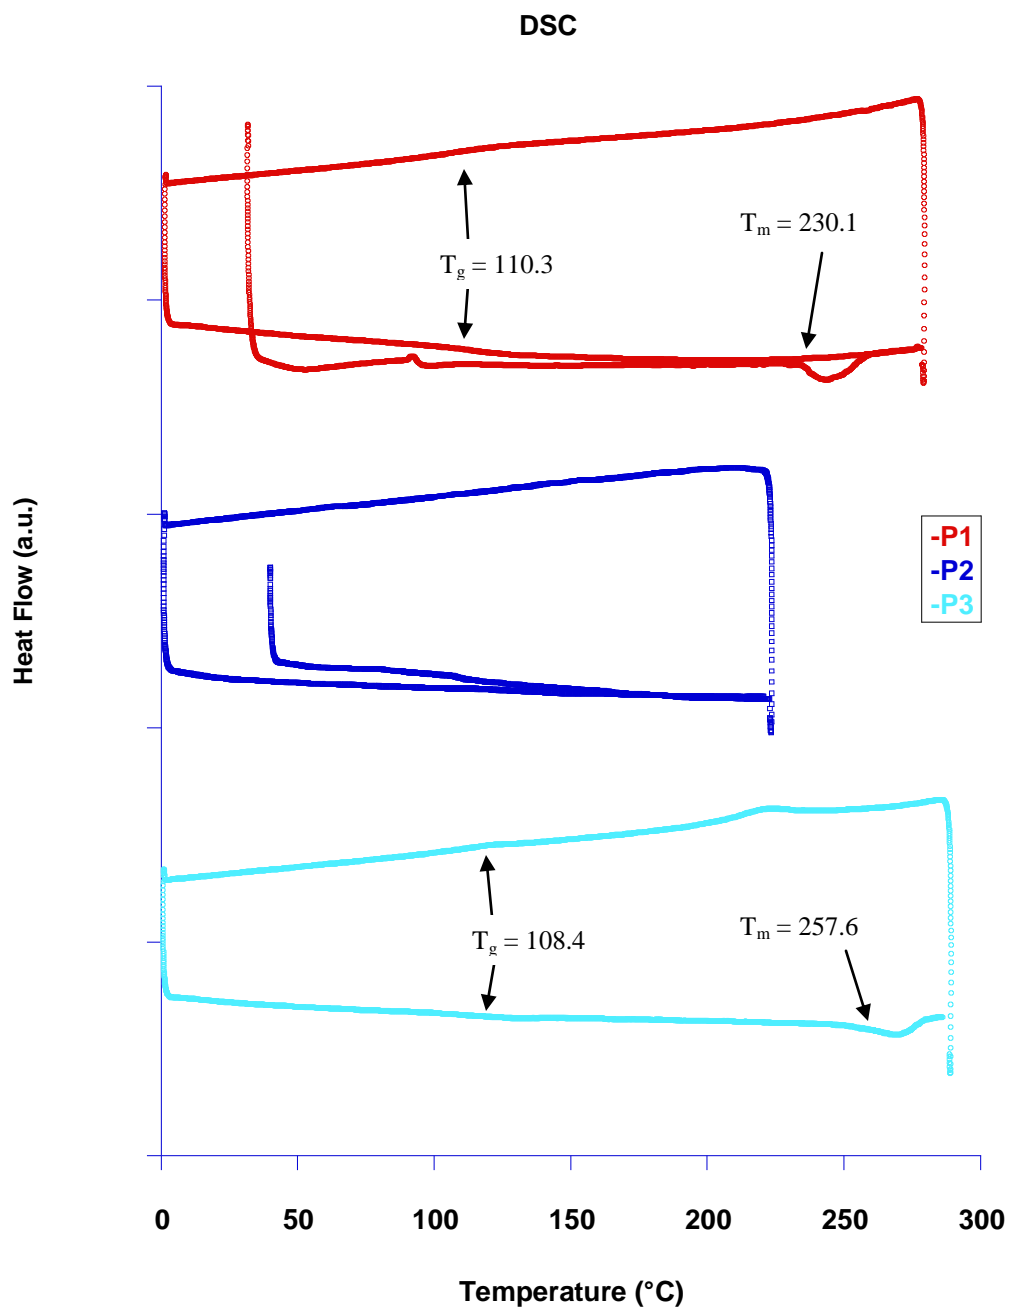

**Fig S3.** XRD.

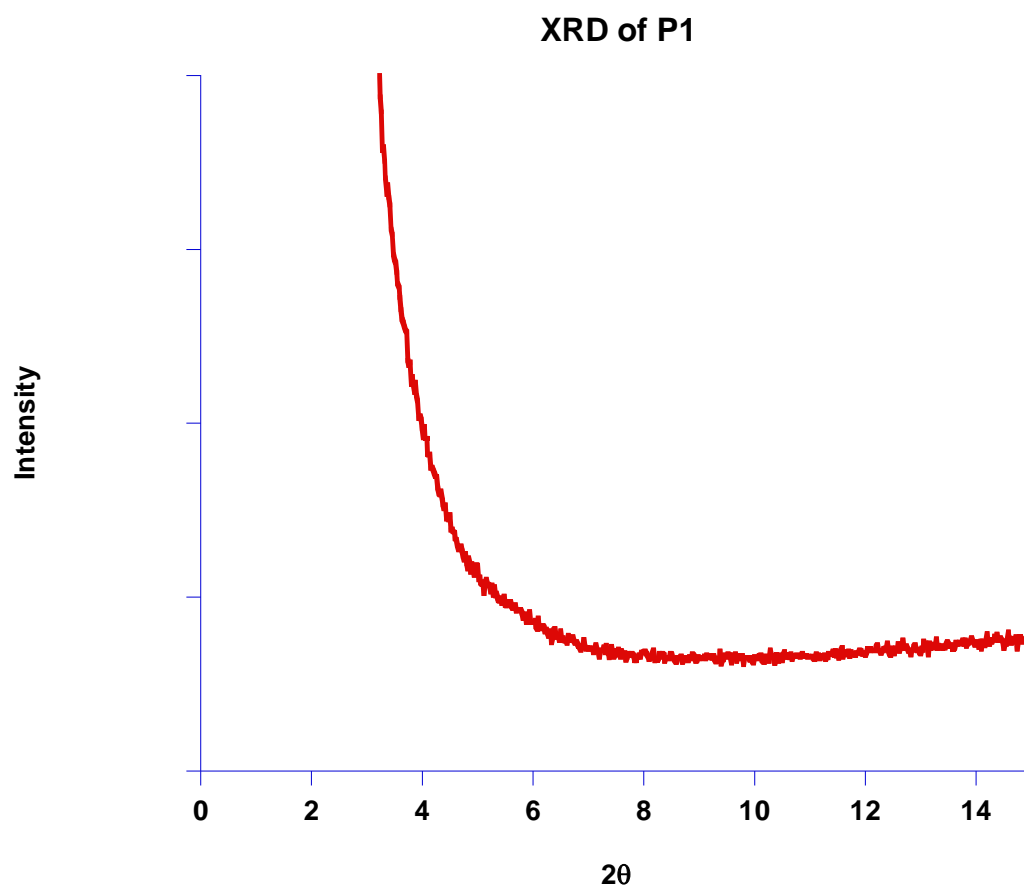

### XRD of P2

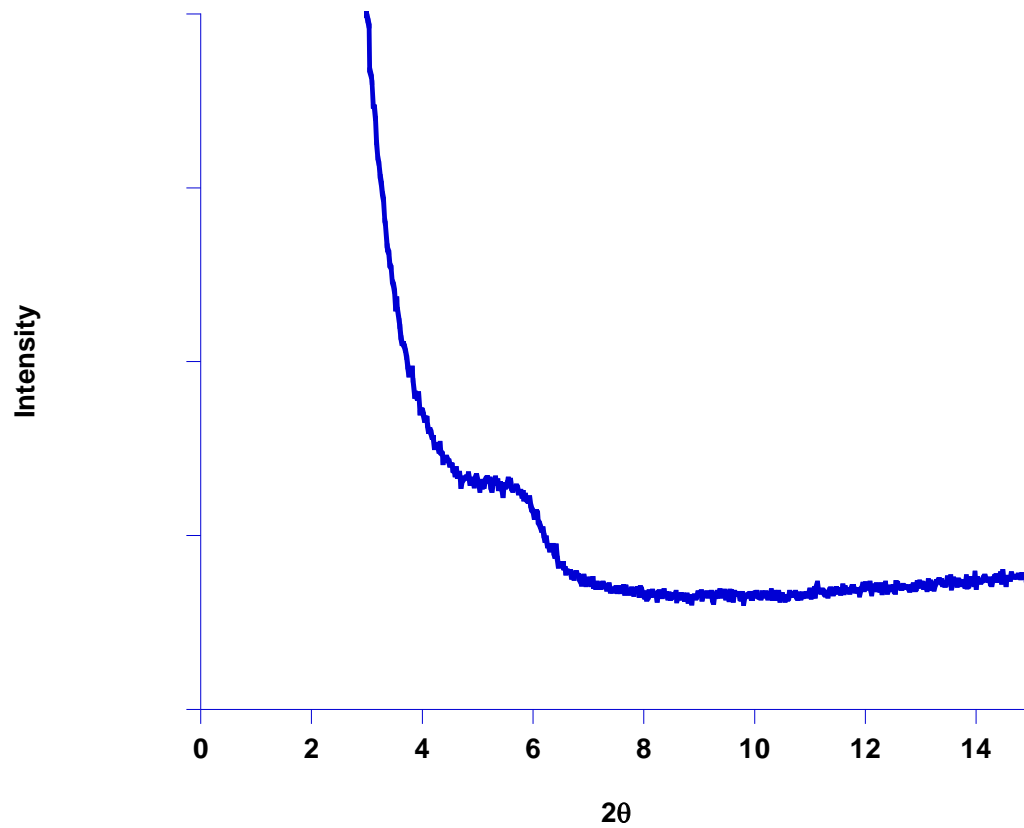

### XRD of P3

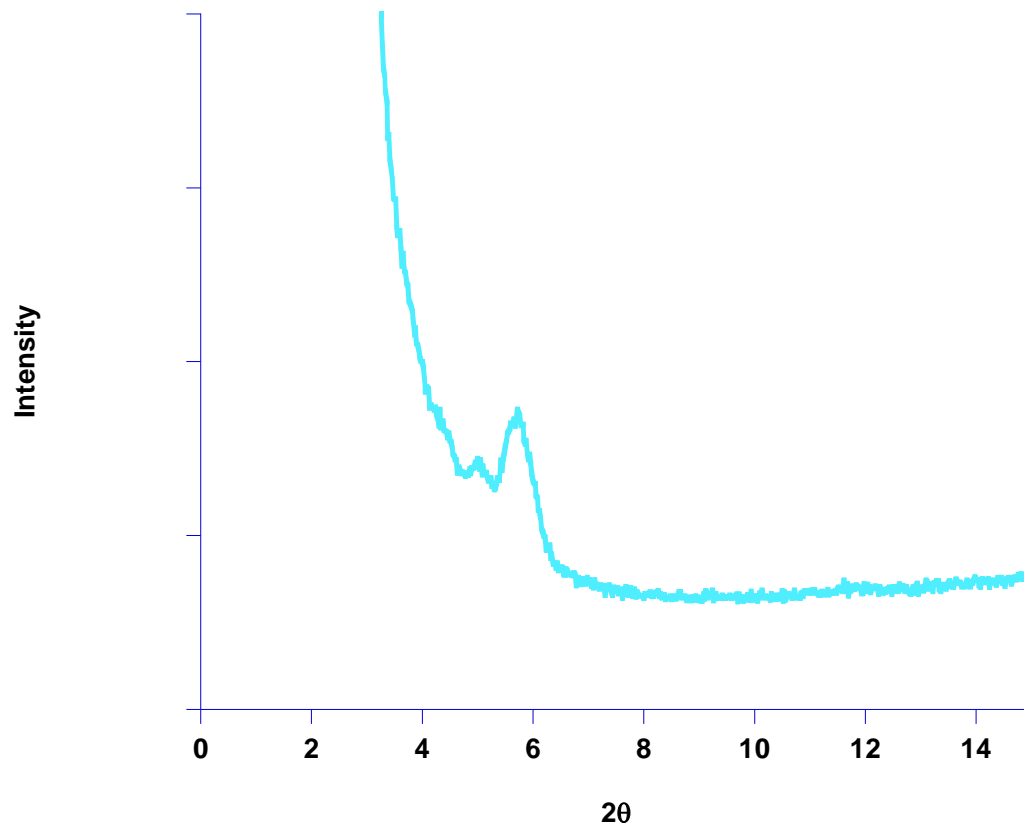

**Figure S4.** Cyclic voltammetry was performed on thin films of polymers that were drop-casted onto the ends of 1mm platinum button electrodes using a platinum wire as counter-electrode and a Ag/Ag<sup>+</sup> reference electrode. Ferrocene was used as an internal standard. Measurements were recorded at a scan rate of 100 mV/s.

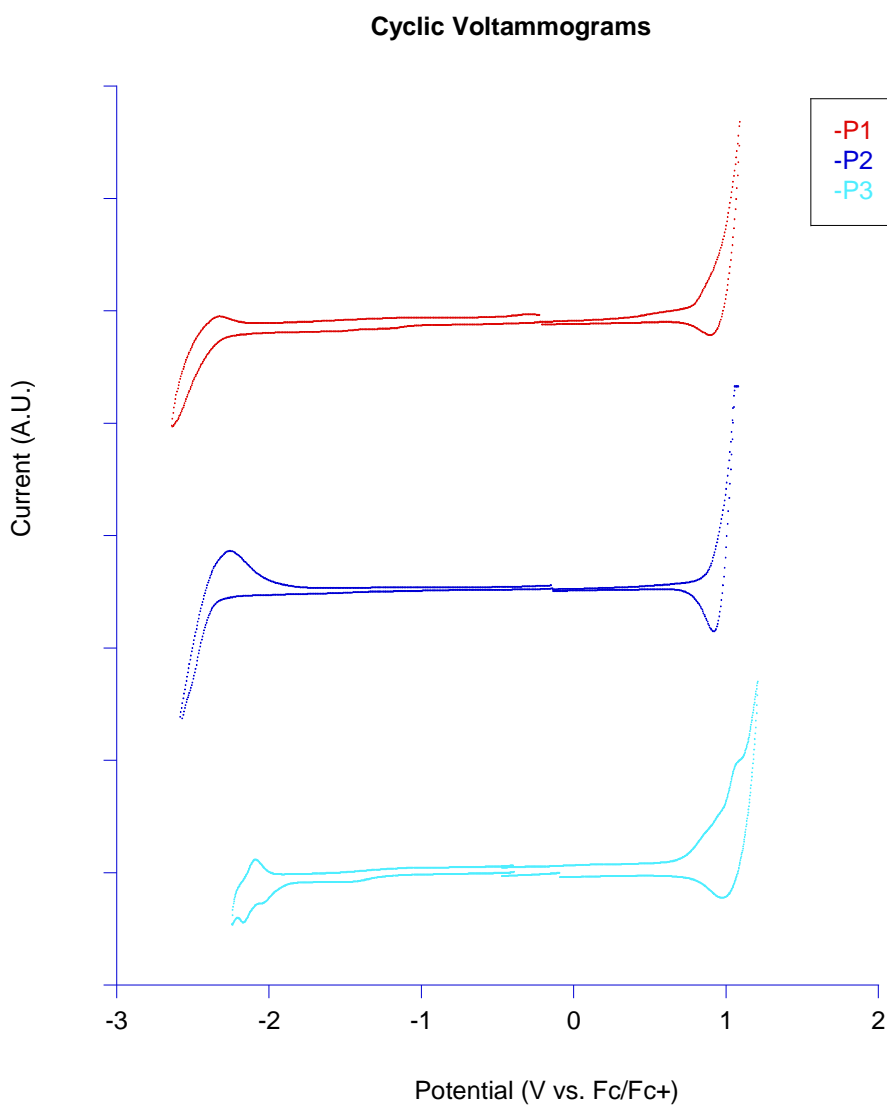

**Figure S5.** Differential pulse voltammetry was performed on thin films of polymers that were drop-casted onto the ends of 1mm platinum button electrodes using a platinum wire as counter-electrode and a Ag/Ag<sup>+</sup> reference electrode. Ferrocene was used as an internal standard. Measurements were recorded at a scan rate of 100 mV/s with a pulse height of 100 mV, step width of 50 ms, and pulse time of 25 ms.

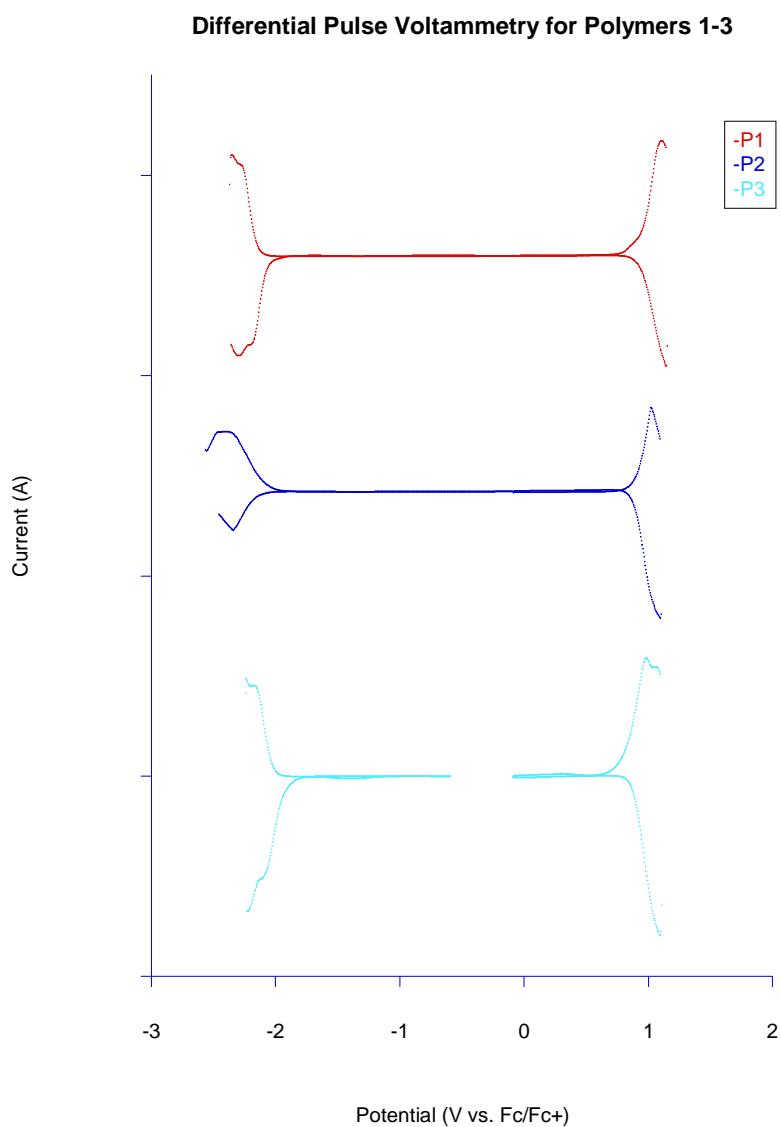



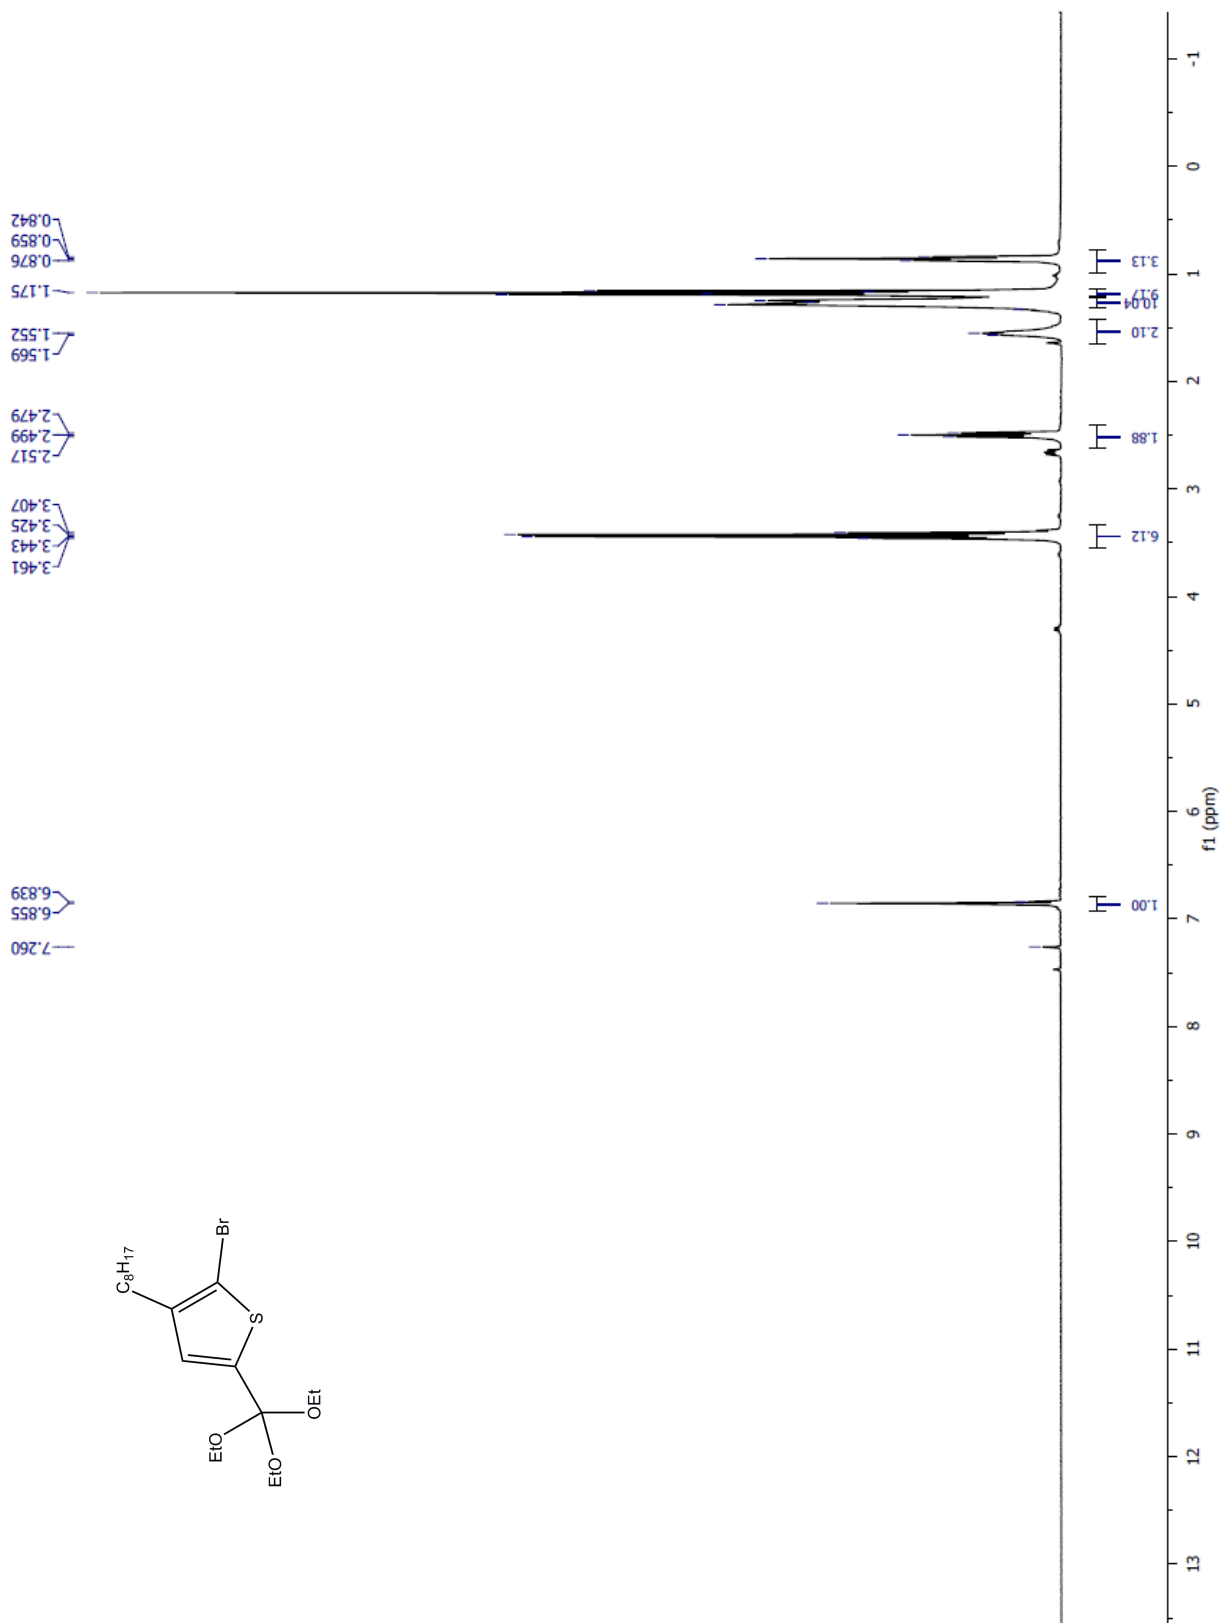

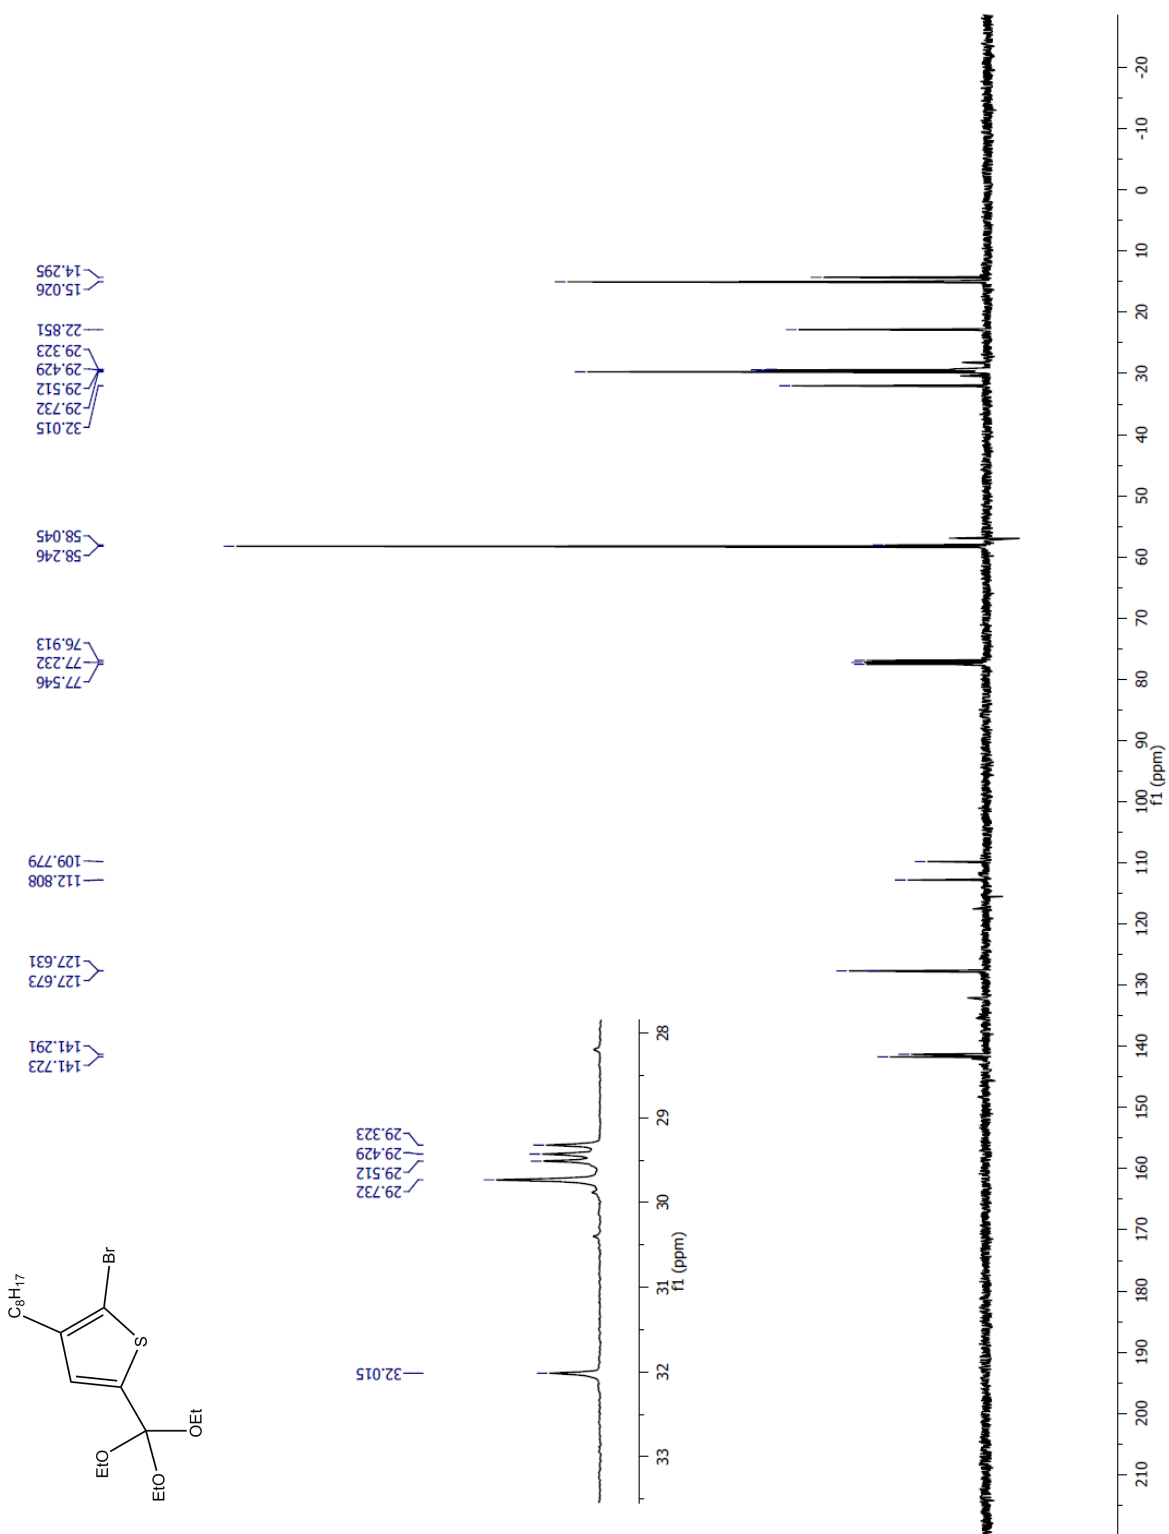

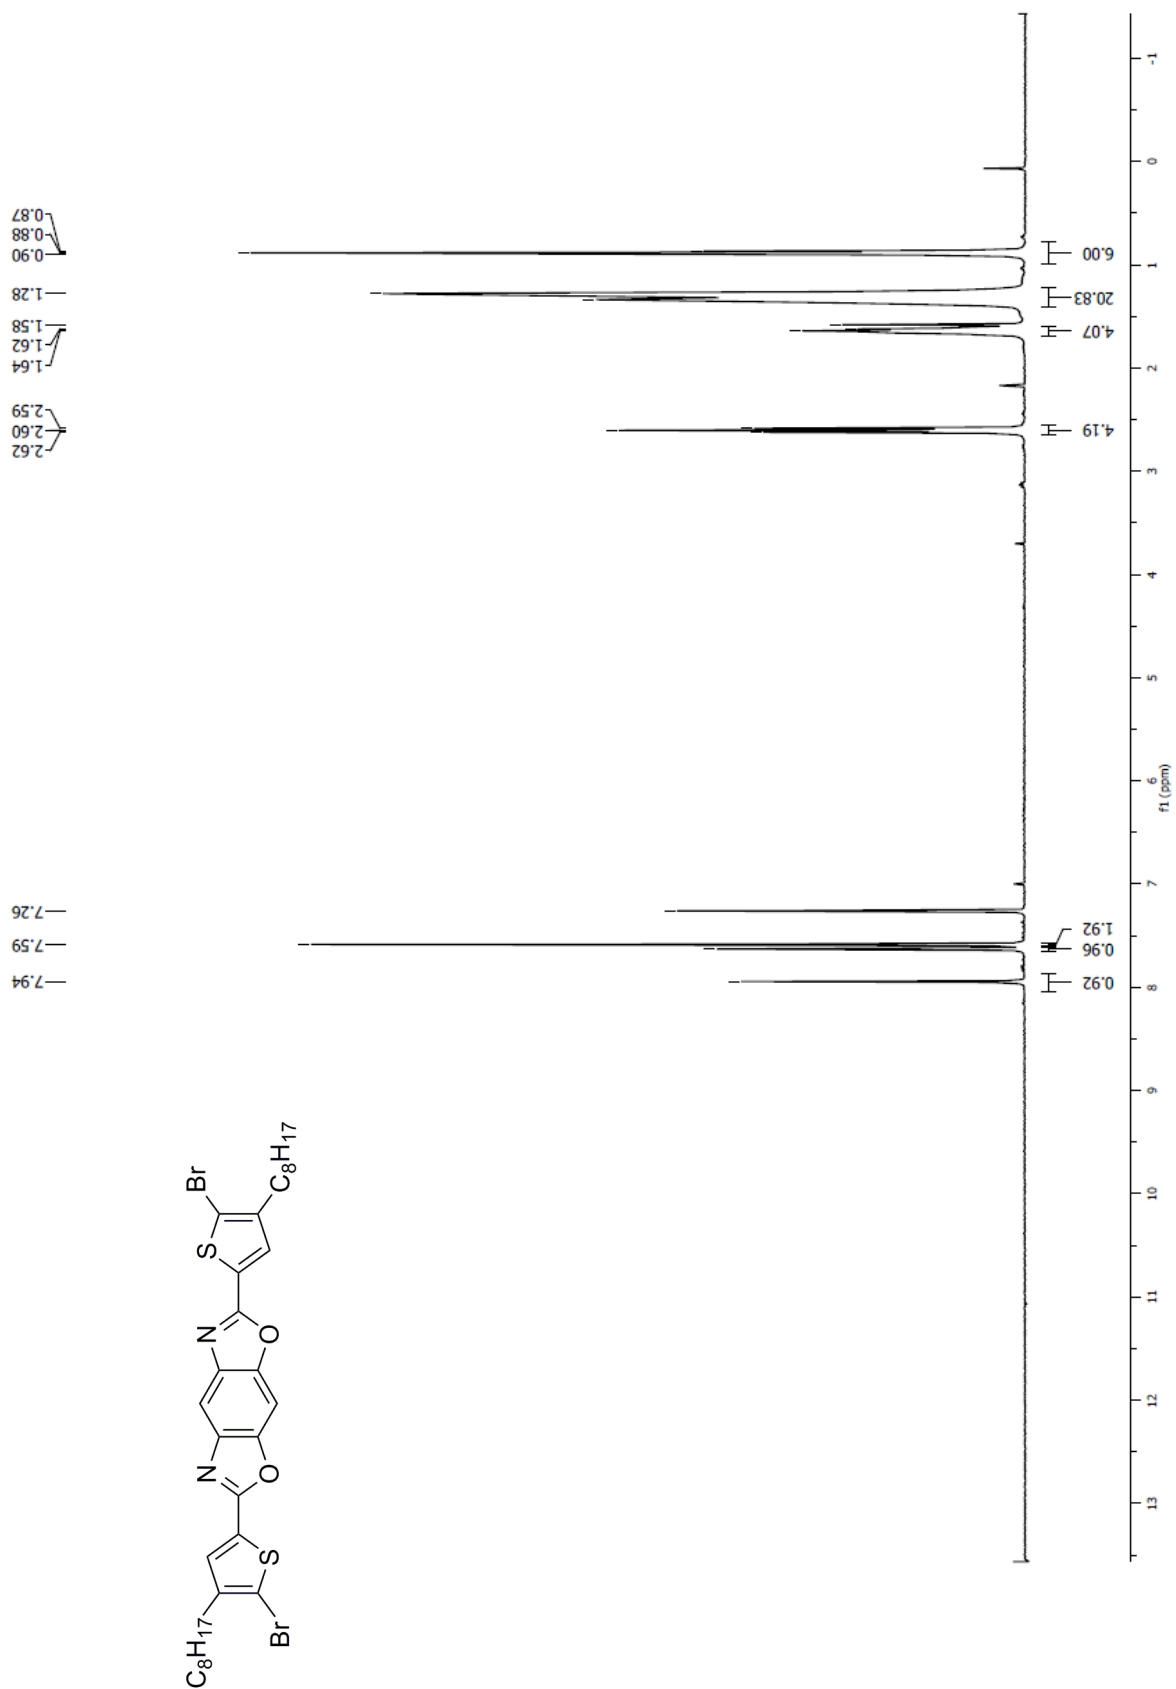

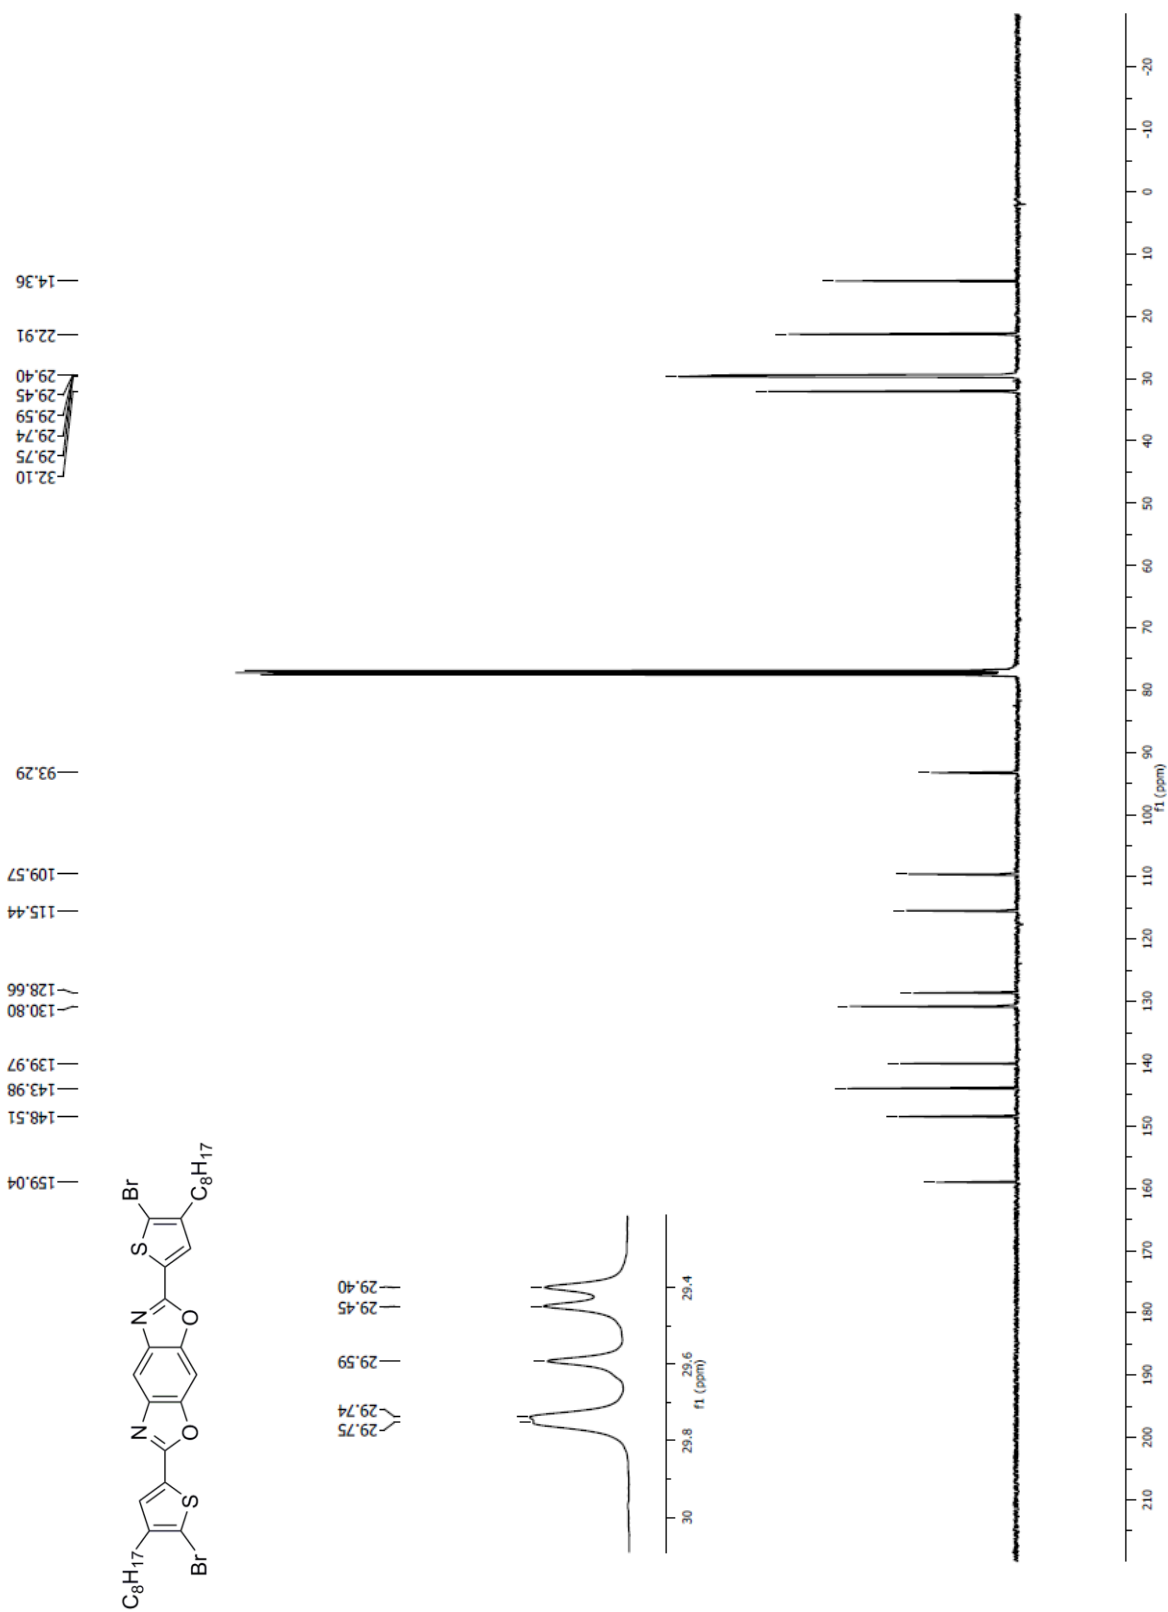

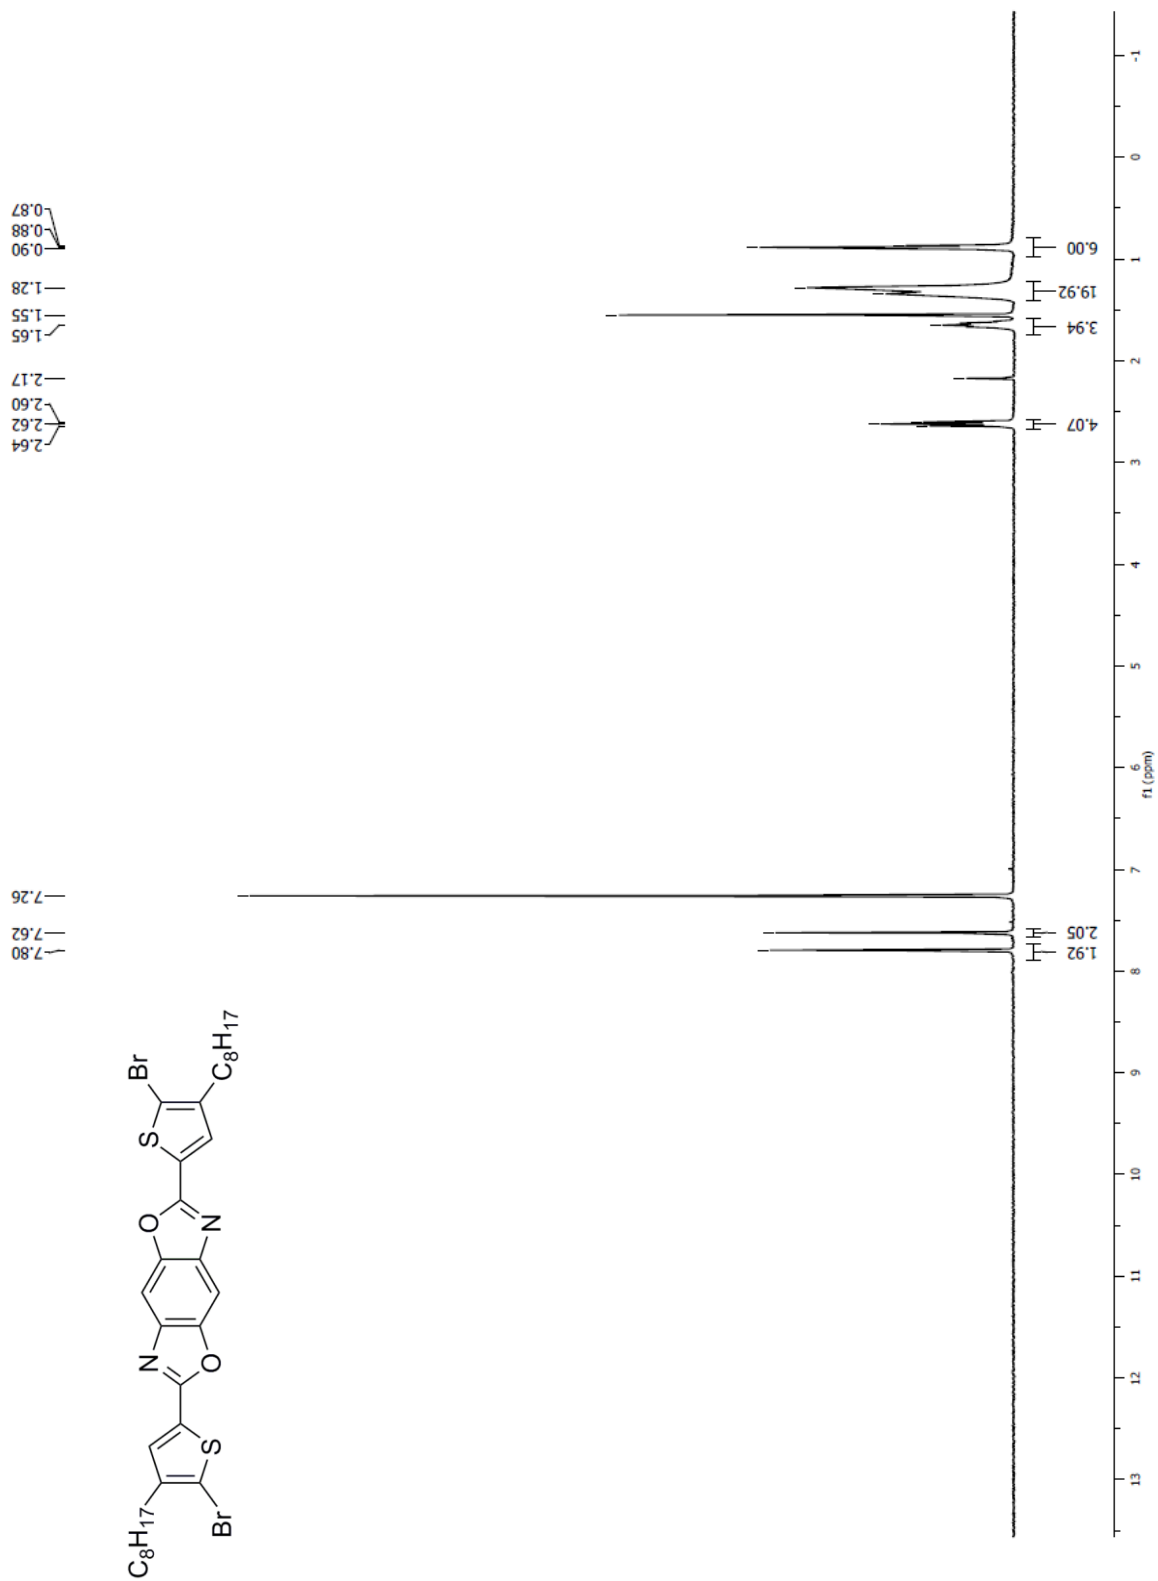

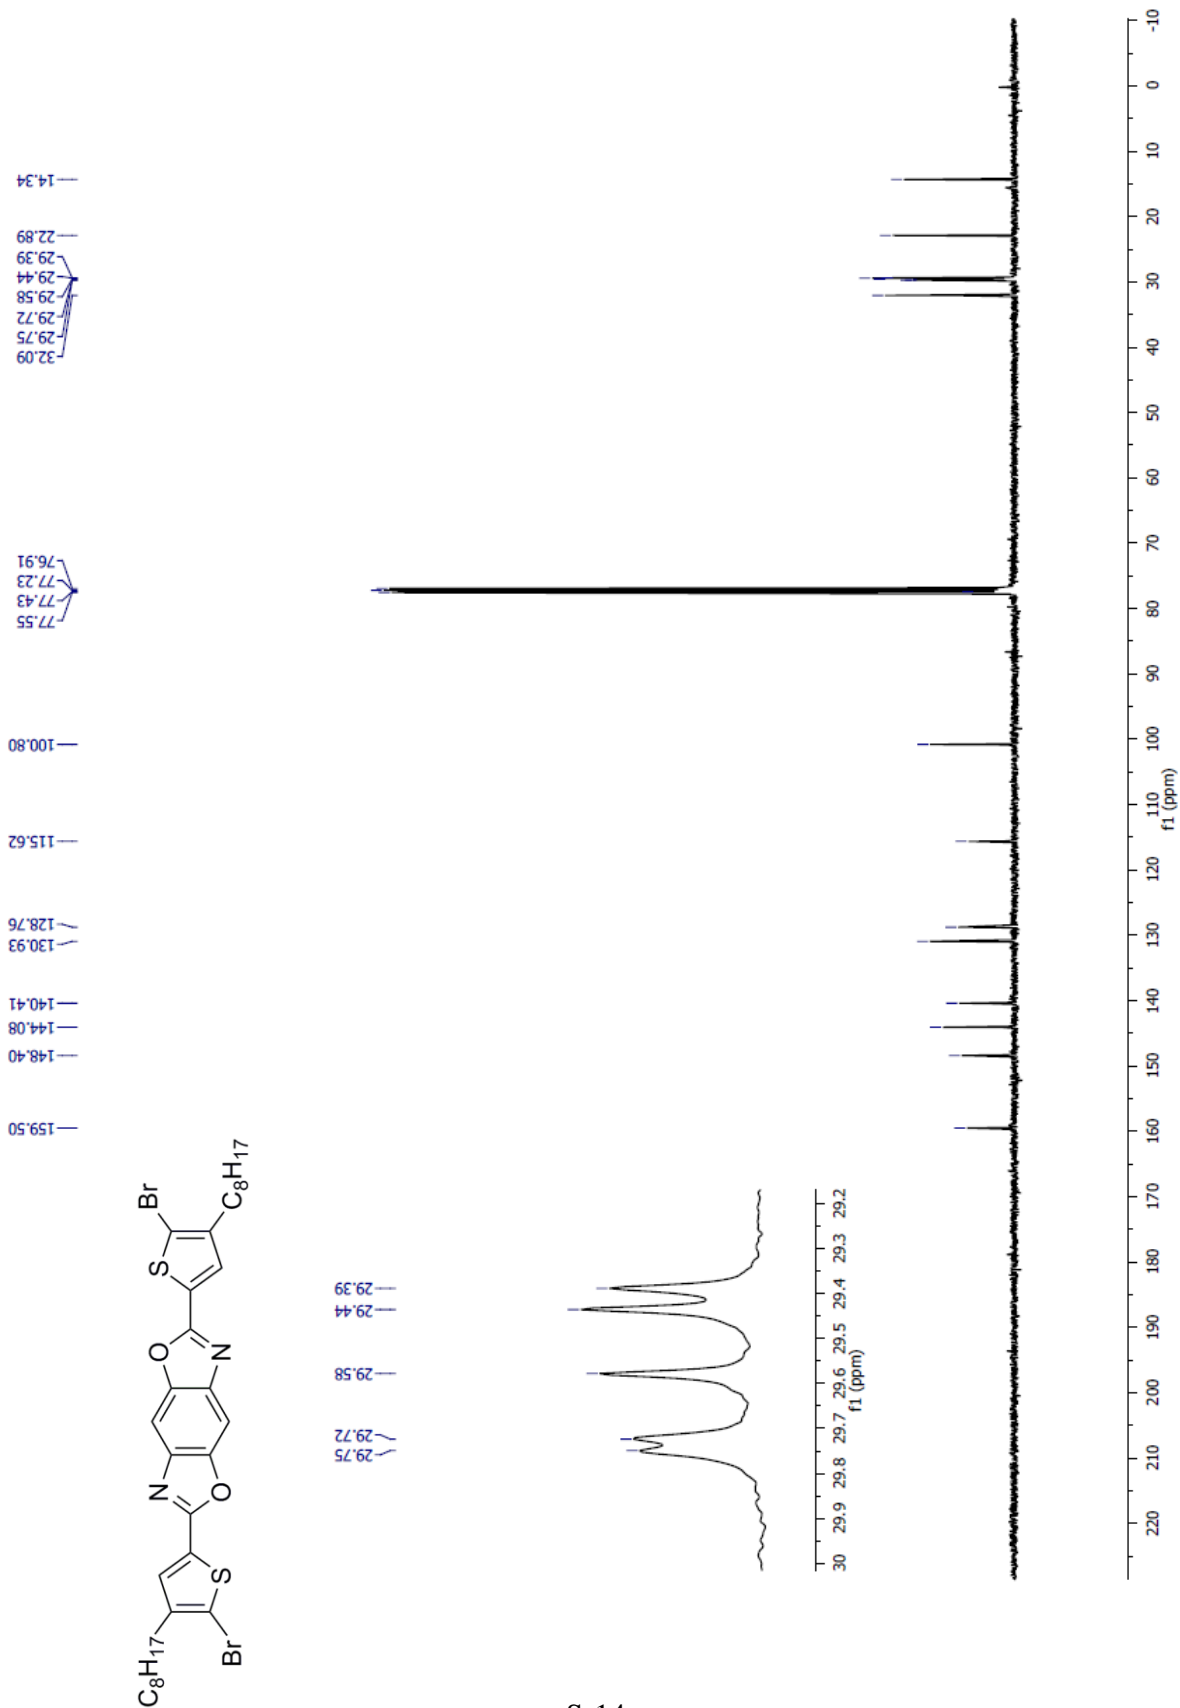

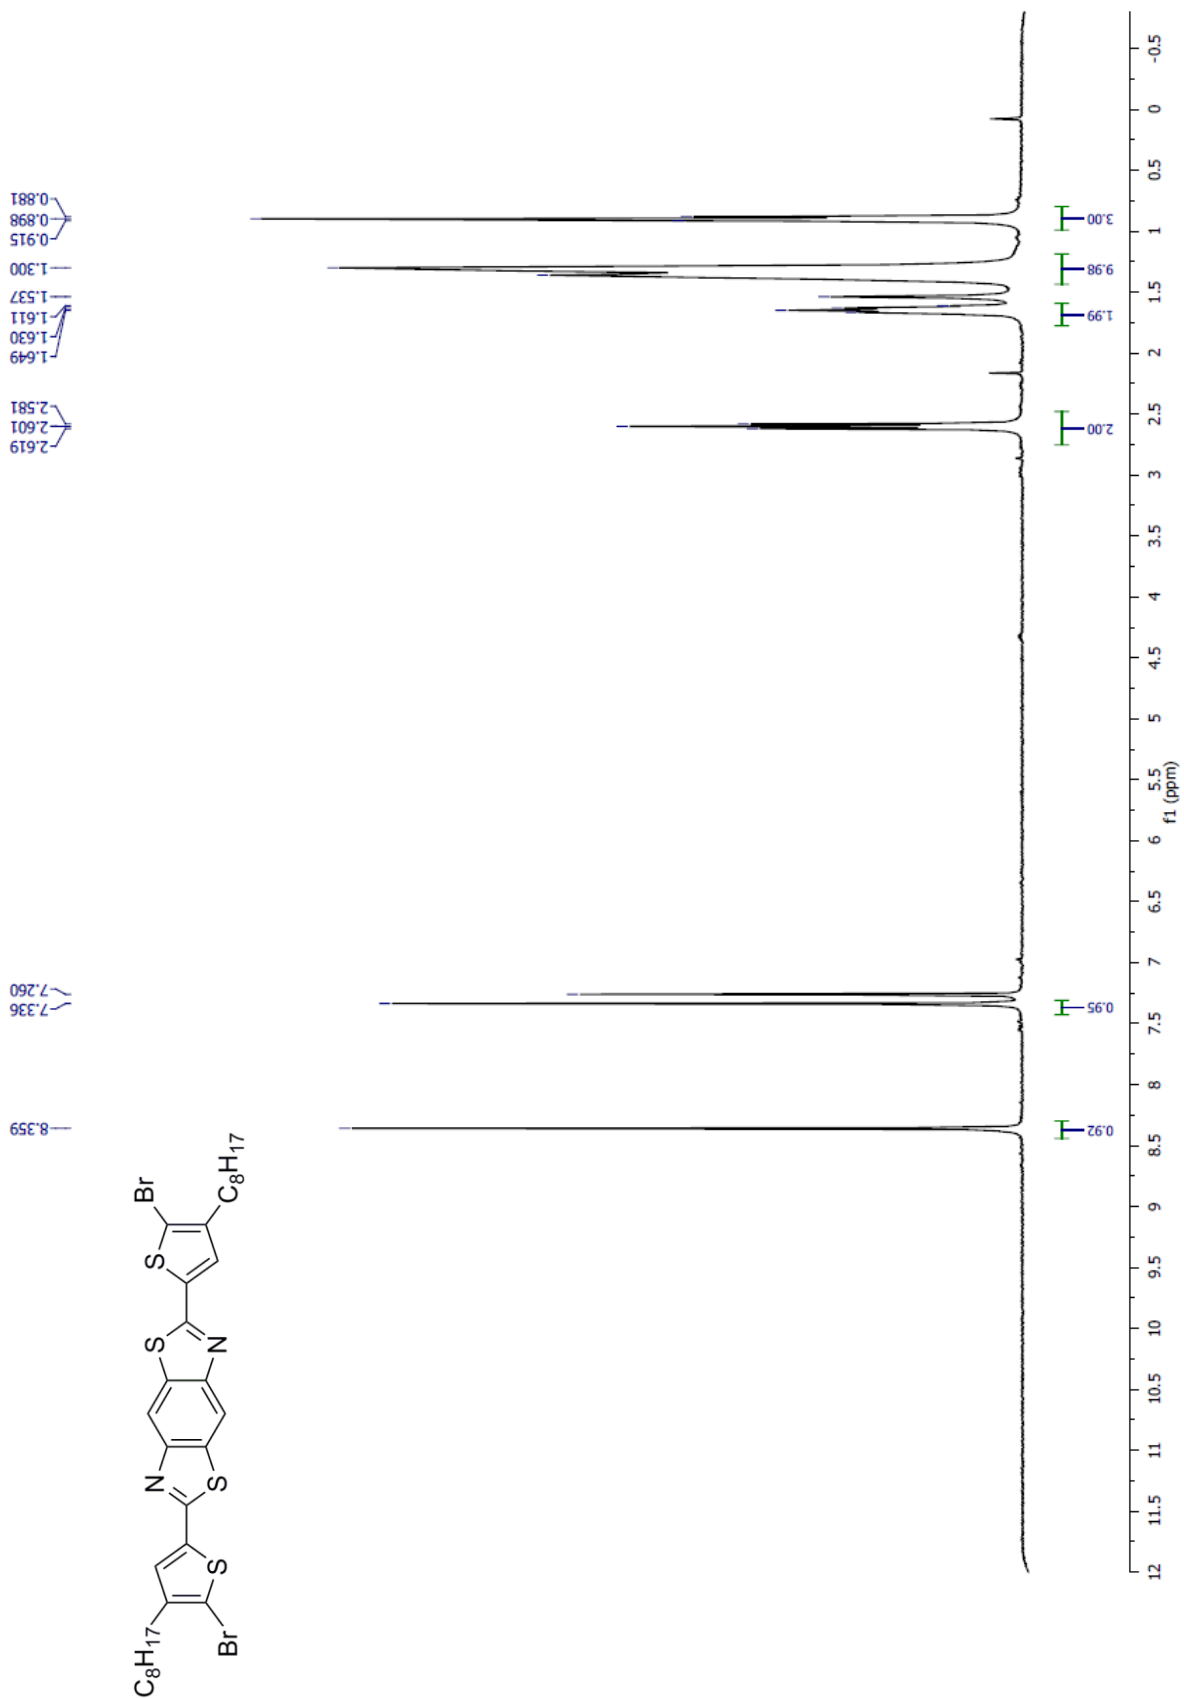

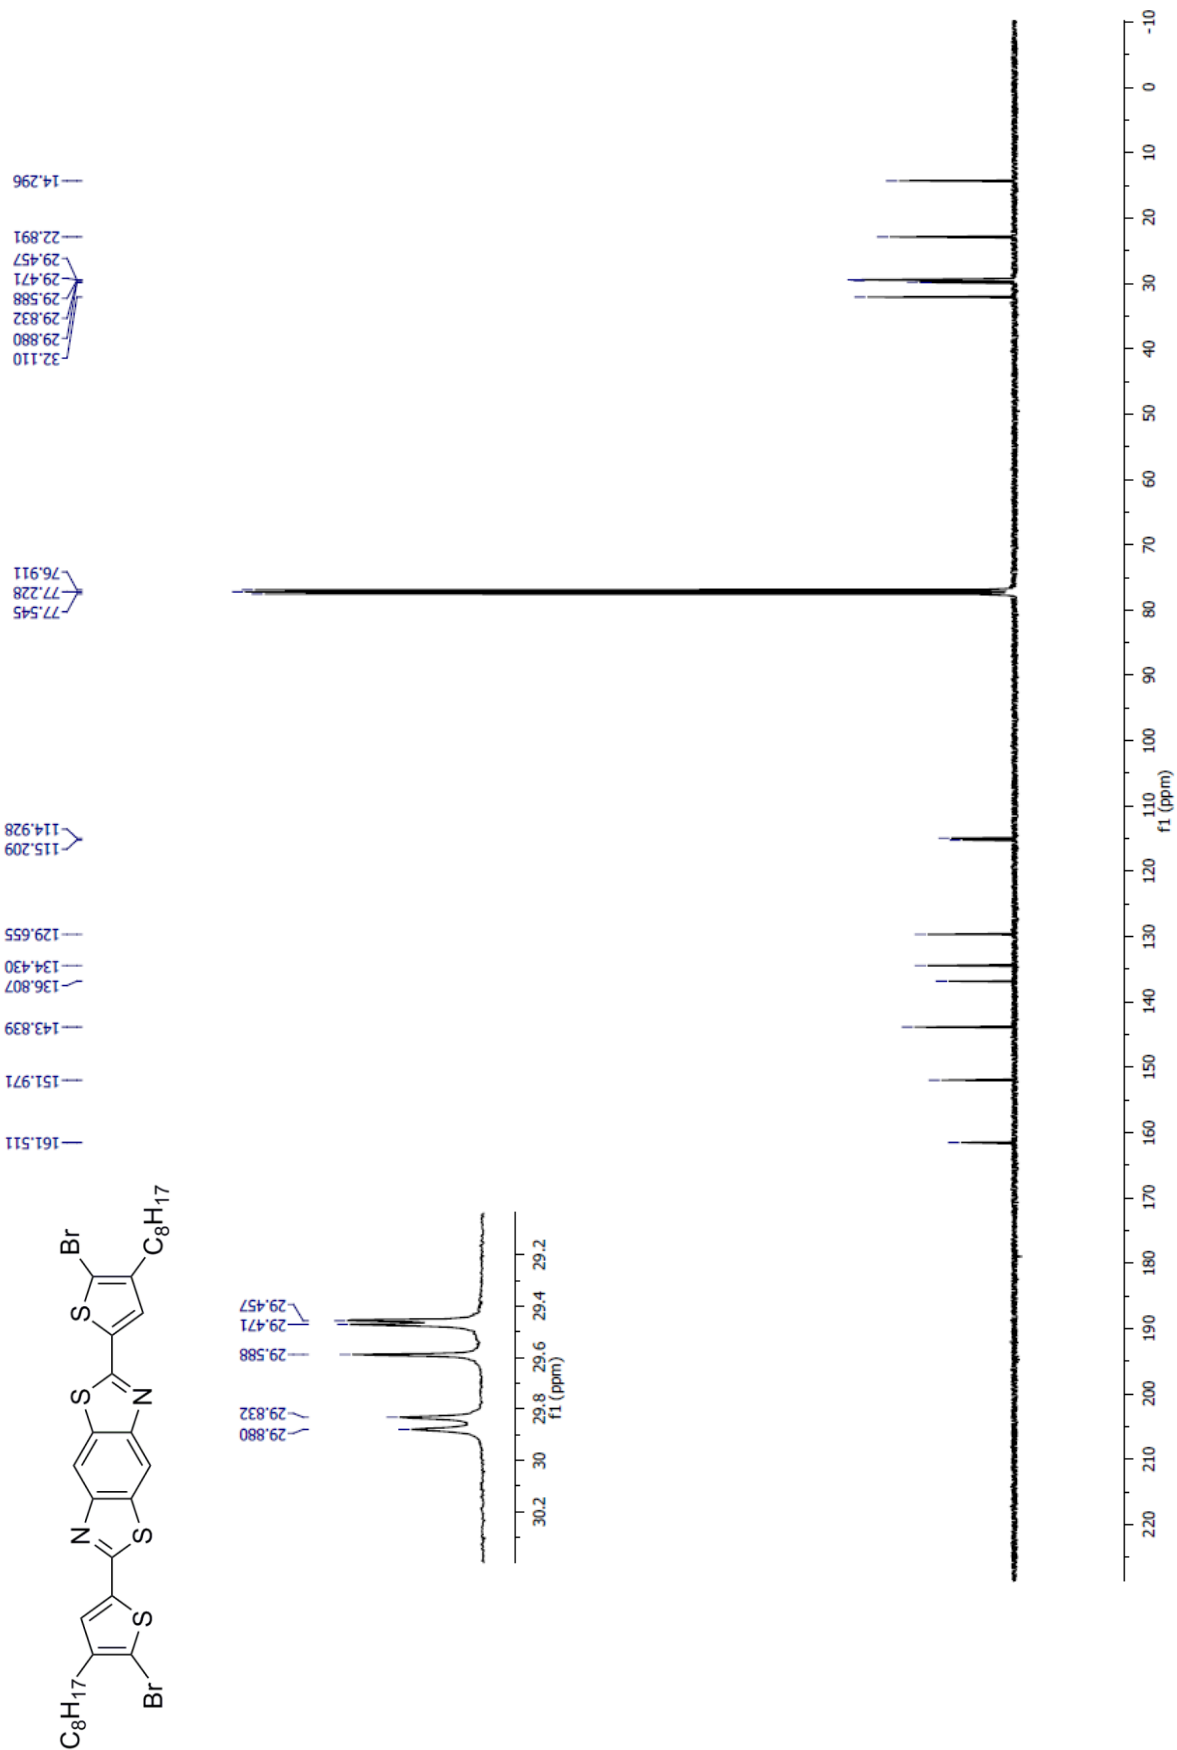



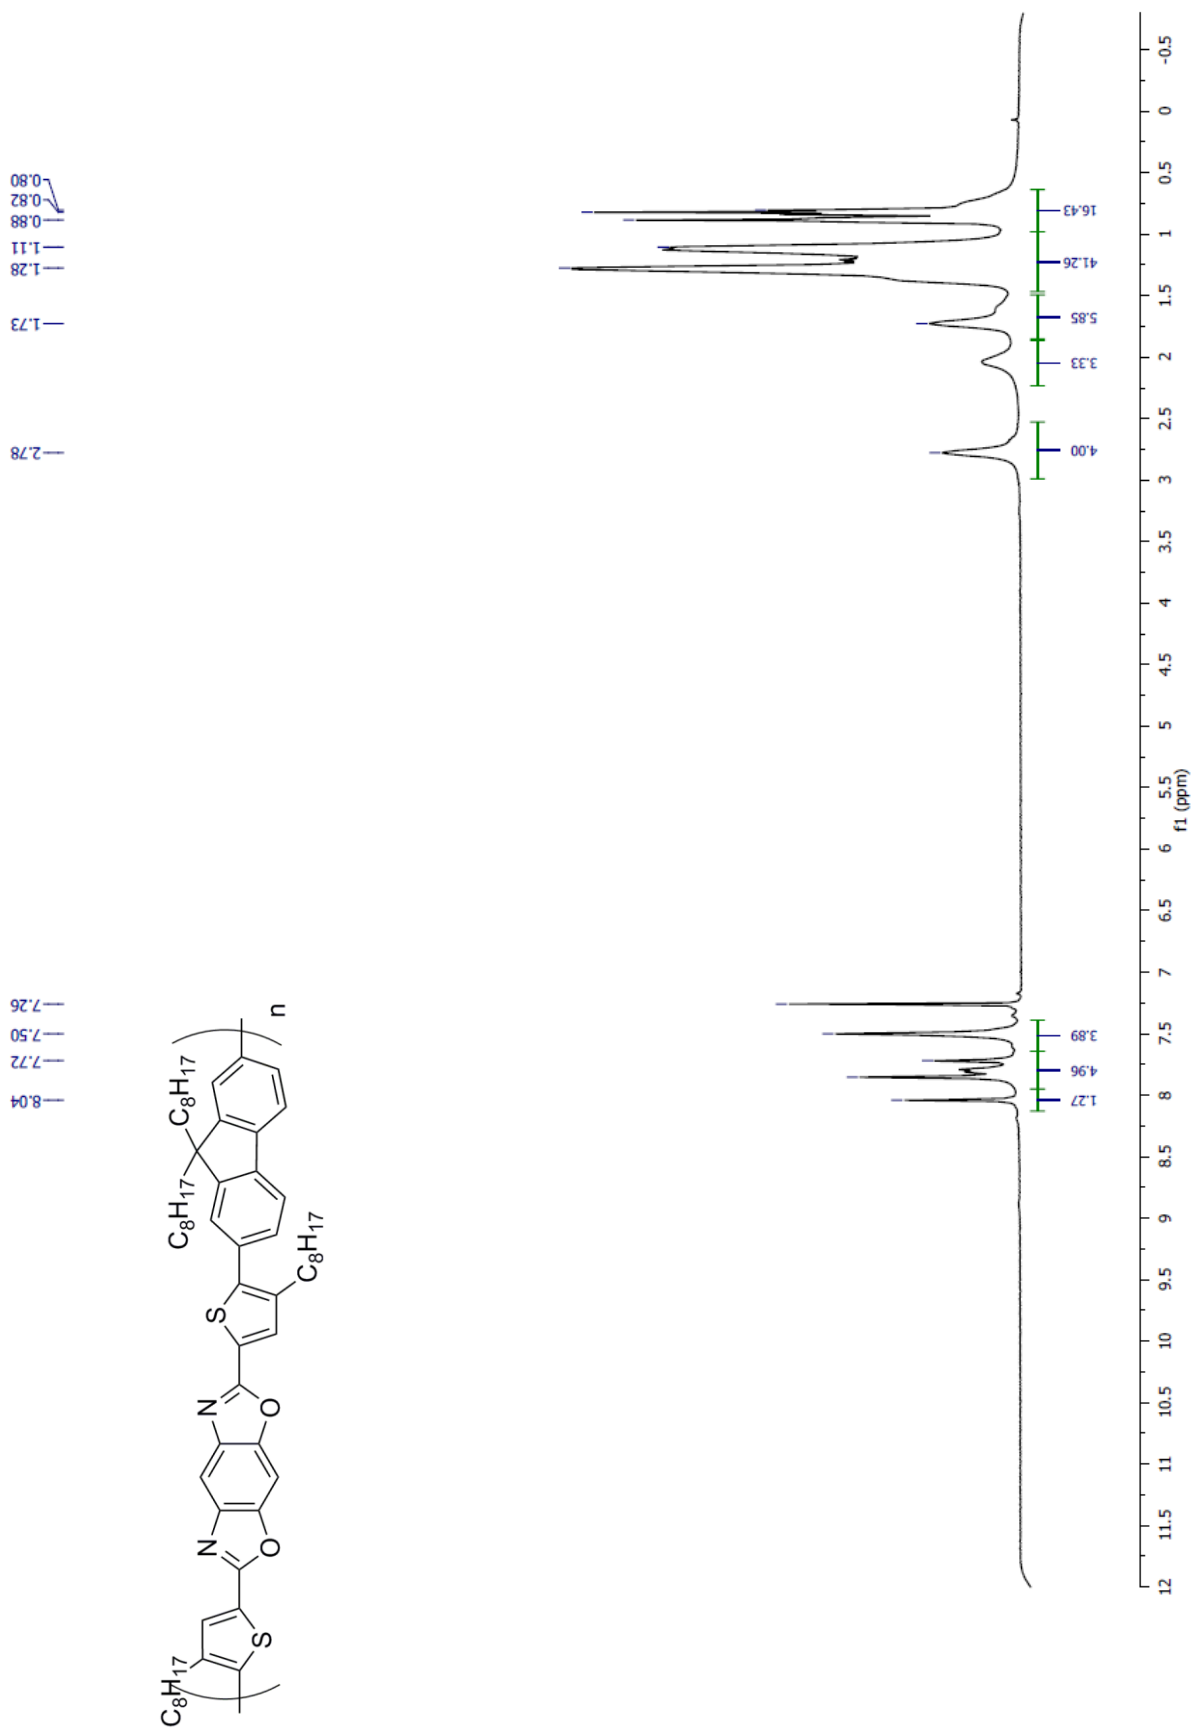

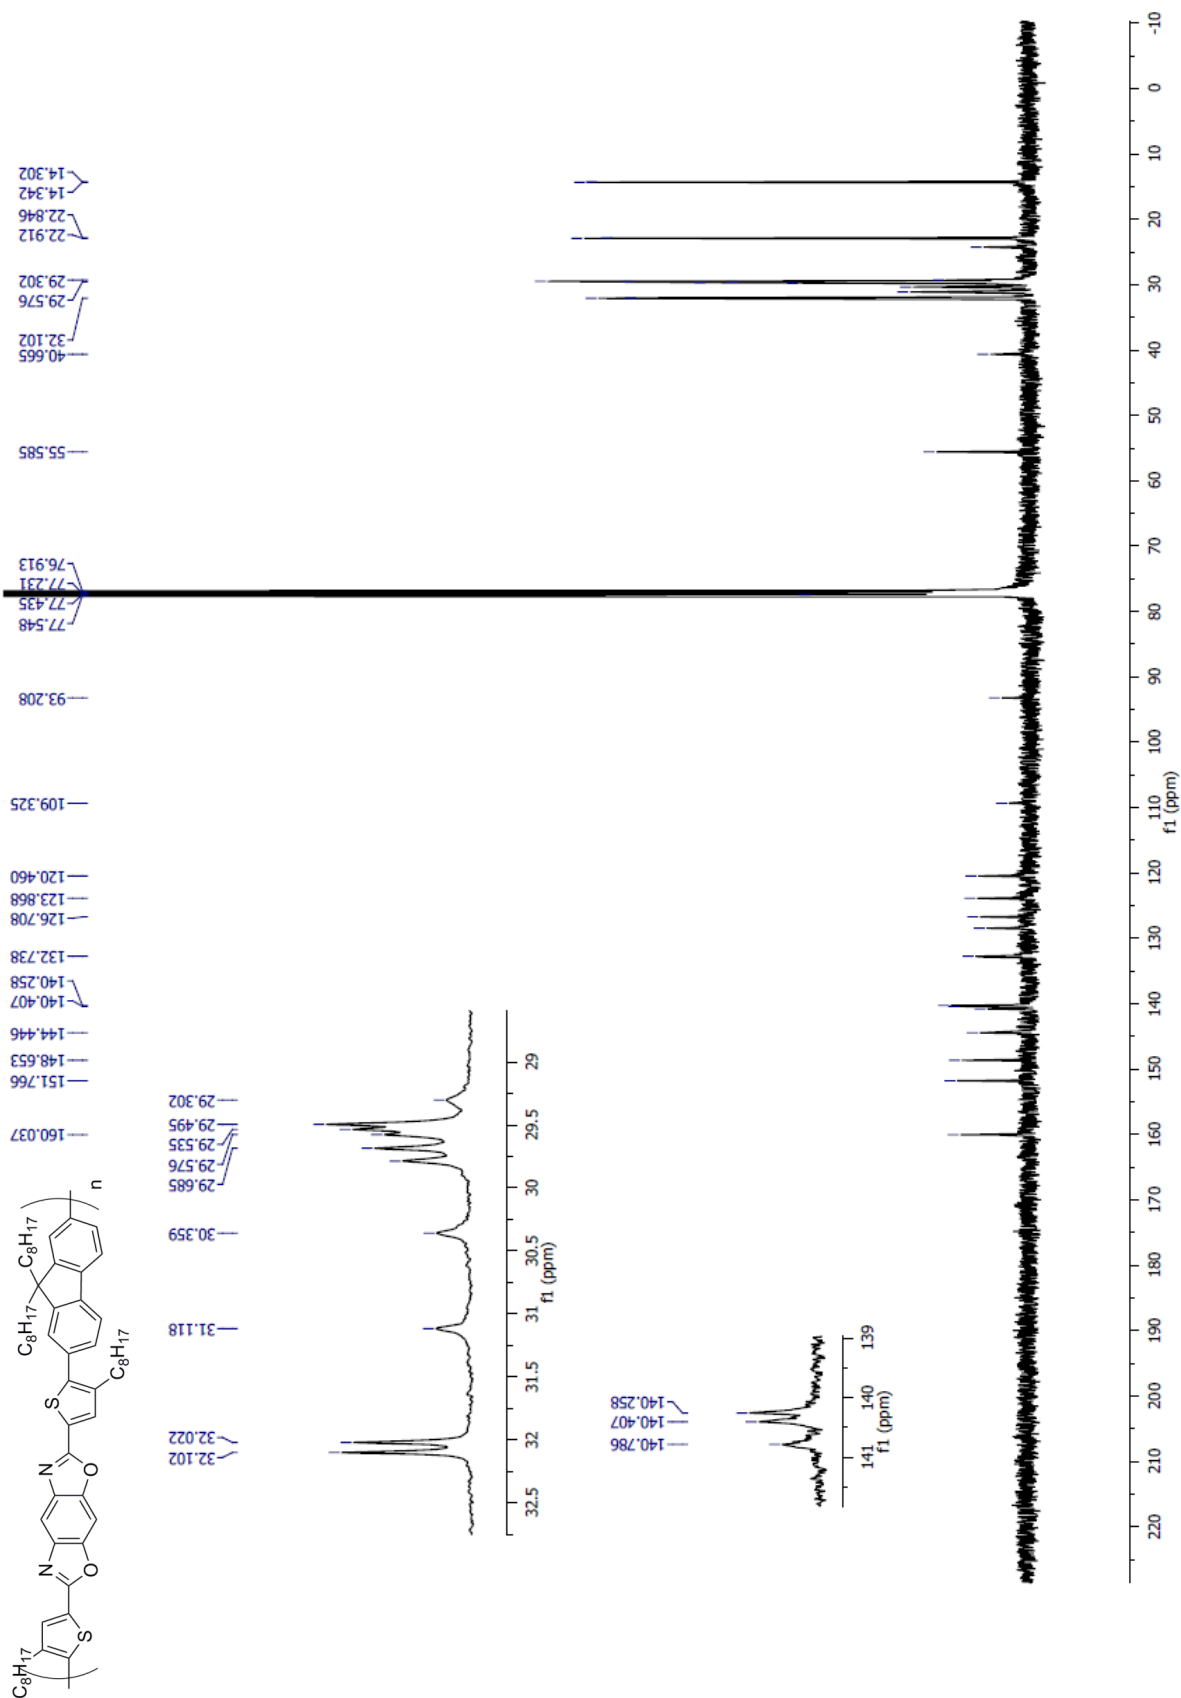

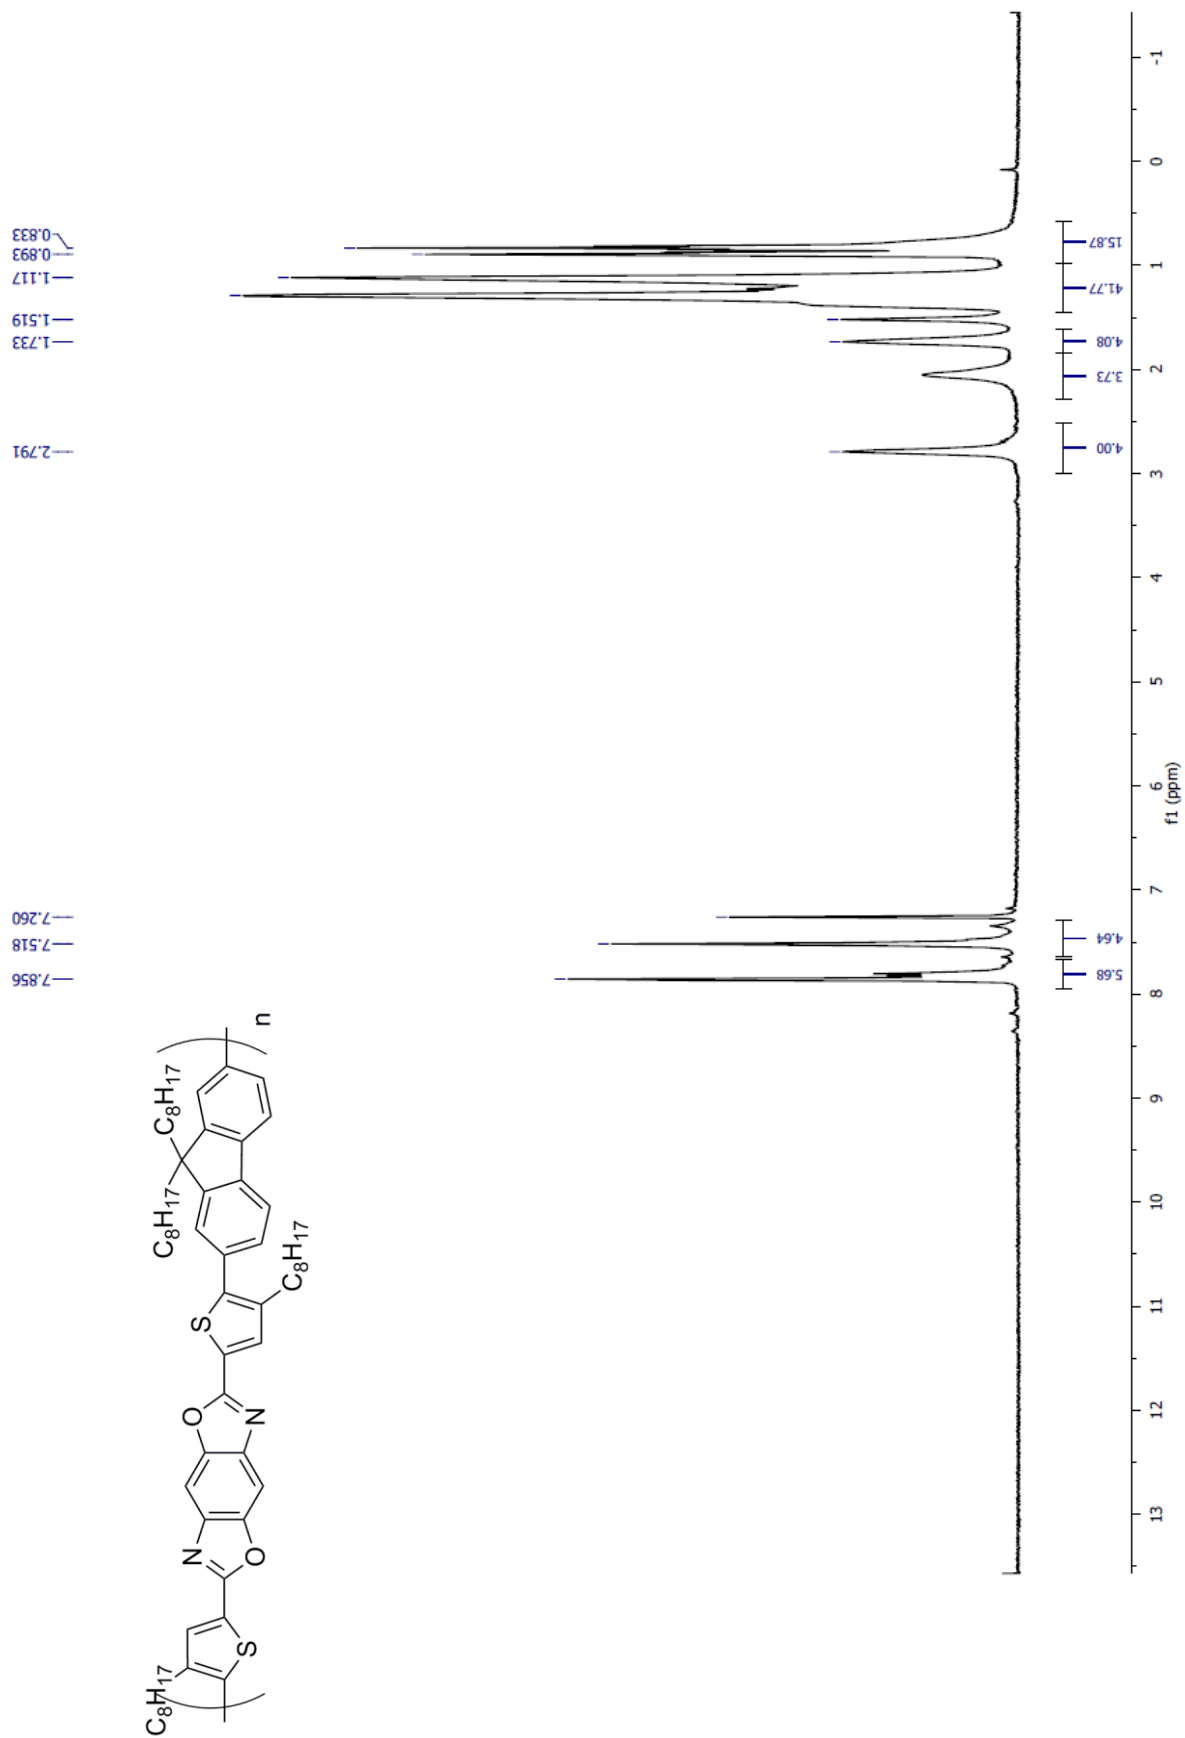

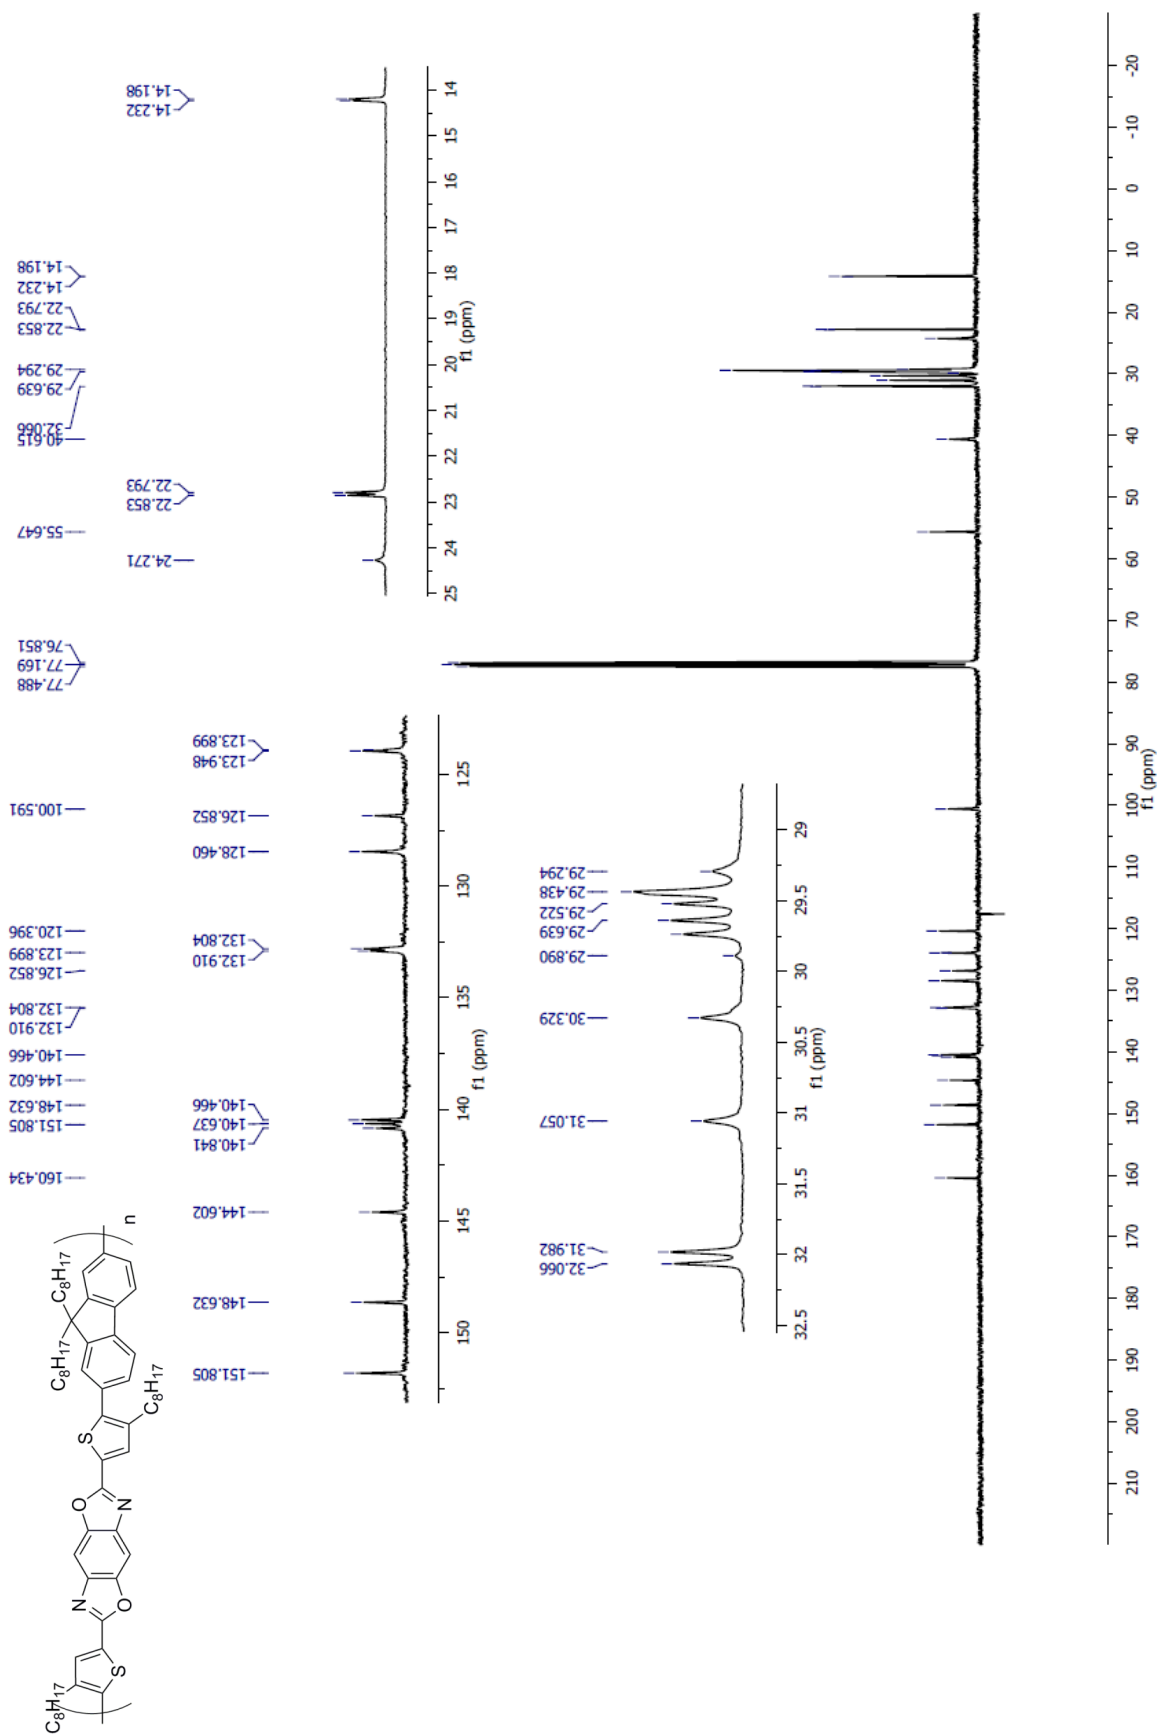

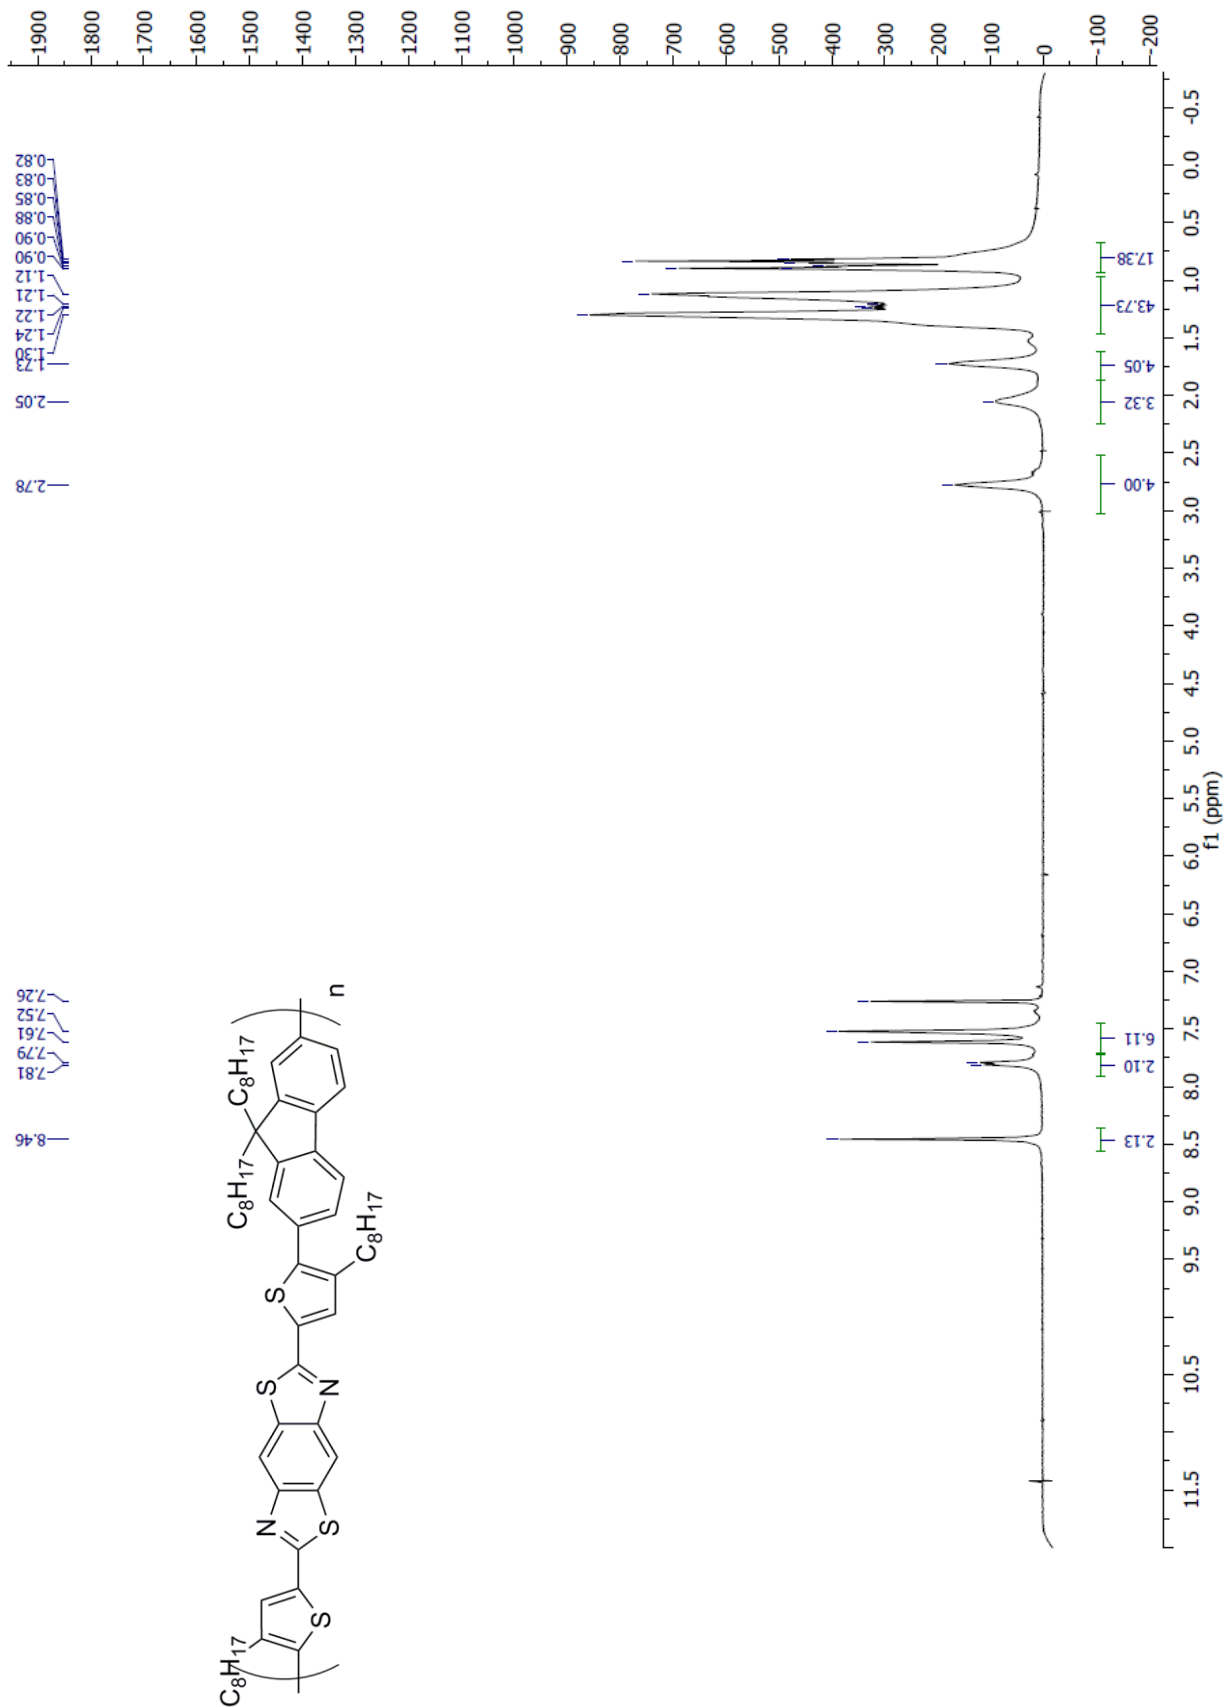

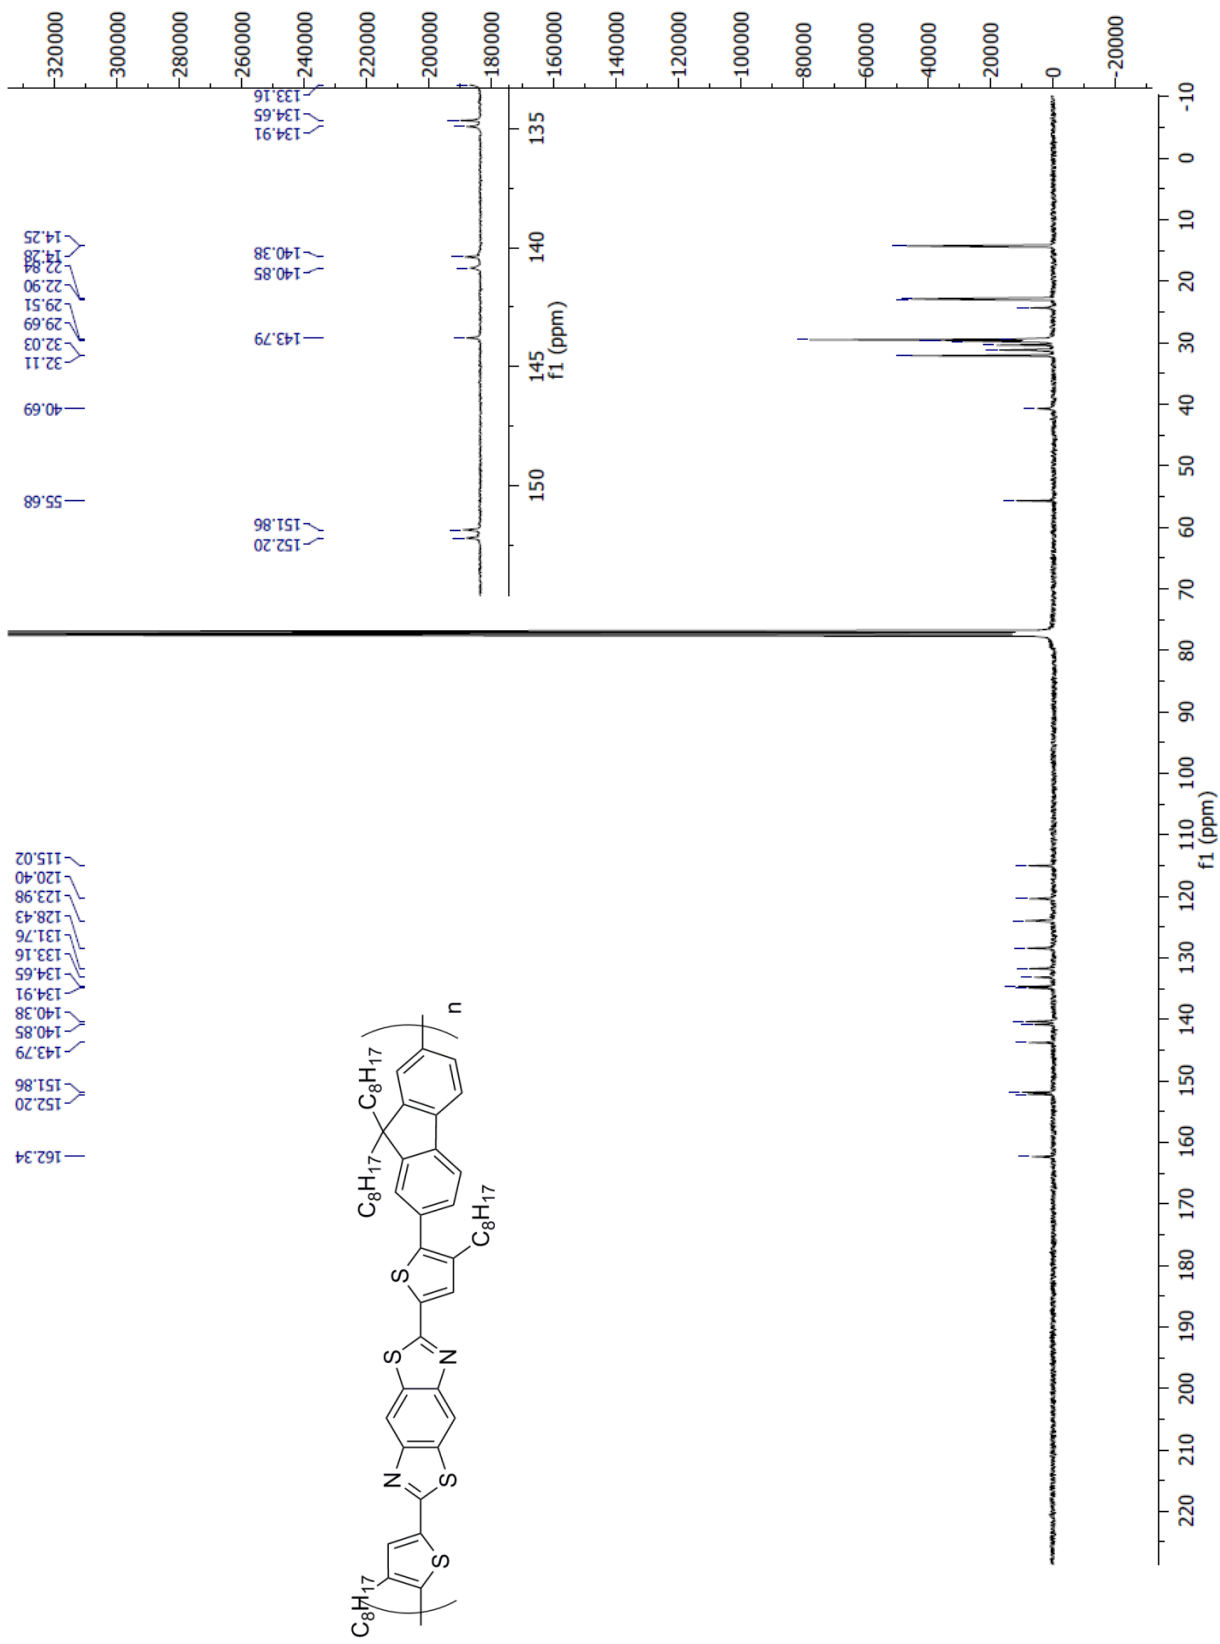

Supplement: c1py00218j.pdf [file c1py00218j.pdf]
